1

2 **High mannose N-glycans on red blood cells as phagocytic ligands,**  
3 **mediating both sickle cell anaemia and resistance to malaria**

4

5 Huan Cao<sup>1</sup>, Aristotelis Antonopoulos<sup>2</sup>, Sadie Henderson<sup>3</sup>, Heather Wassall<sup>1</sup>, John Brewin<sup>4</sup>,  
6 Alanna Masson<sup>5</sup>, Jenna Shepherd<sup>1</sup>, Gabriela Konieczny<sup>1</sup>, Bhinal Patel<sup>2</sup>, Maria-Louise Williams<sup>1</sup>,  
7 Adam Davie<sup>1</sup>, Megan A Forrester<sup>1</sup>, Lindsay Hall<sup>1</sup>, Beverley Minter<sup>1</sup>, Dimitris Tampakis<sup>6</sup>,  
8 Michael Moss<sup>3</sup>, Charlotte Lennon<sup>1</sup>, Wendy Pickford<sup>1</sup>, Lars Erwig<sup>1</sup>, Beverley Robertson<sup>2</sup>,  
9 Anne Dell<sup>4</sup>, Gordon D. Brown<sup>1,7</sup>, Heather M. Wilson<sup>1</sup>, David C. Rees<sup>4</sup>, Stuart M. Haslam<sup>2</sup>, J.  
10 Alexandra Rowe<sup>8</sup>, Robert N. Barker<sup>\*1</sup>, Mark A. Vickers<sup>\*1,3,5</sup>

11

12 <sup>1</sup>School of Medicine, Medical Sciences and Nutrition, University of Aberdeen, U.K.

13 <sup>2</sup>Department of Life Sciences, Imperial College London, U.K.

14 <sup>3</sup>Scottish National Blood Transfusion Service, Aberdeen, U.K.

15 <sup>4</sup>Department of Haematology, King's College Hospital, London, U.K.

16 <sup>5</sup>Department of Haematology, Aberdeen Royal Infirmary, Aberdeen, U.K.

17 <sup>6</sup>Centre for Biological Engineering, School of Mechanical, Electrical and Manufacturing  
18 Engineering, Loughborough University and Division of Cancer Studies, King's College London,  
19 U.K.

20 <sup>7</sup>Medical Research Council Centre for Medical Mycology at the University of Exeter.

21 <sup>8</sup>Centre for Immunity, Infection and Evolution, Institute of Immunology and Infection Research,  
22 University of Edinburgh, U.K.

23 \*These authors contributed equally to this work

24 **Abstract**

25

26 In both sickle cell disease (SCD) and malaria, red blood cells (RBCs) are phagocytosed in the  
27 spleen, but receptor-ligand pairs mediating uptake have not been identified. Here, we report that  
28 patches of high mannose N-glycans (Man<sub>5-9</sub>GlcNAc<sub>2</sub>), expressed on diseased or oxidized RBC  
29 surfaces, bind the mannose receptor (CD206) on phagocytes to mediate clearance. Extravascular  
30 haemolysis in SCD correlates with high mannose glycan levels on RBCs. Infection of RBCs  
31 with *Plasmodium falciparum* expose surface mannose N-glycans on healthy RBCs, which  
32 occurred at significantly higher levels on RBCs from subjects with sickle cell trait compared to  
33 those lacking haemoglobin S. The glycans were associated with high molecular weight  
34 complexes and protease-resistant, lower molecular weight fragments containing spectrin.  
35 Recognition of surface N-linked high mannose glycans, a novel response to cellular stress, is the  
36 first molecular mechanism common to both the pathogenesis of SCD and resistance to severe  
37 malaria in sickle cell trait.

## 38 Introduction

39  
40 Sickle cell disease (SCD) comprises a group of disorders affecting over 20 million individuals  
41 and is caused by a mutation causing an amino acid substitution (E6V) in the adult haemoglobin  $\beta$   
42 chain (1, 2), so that the physiological haemoglobin (Hb) A tetramer,  $\alpha_2\beta_2$ , is replaced by the HbS  
43 tetramer  $\alpha_2\beta^S_2$ , which can form pathological polymers. The disease is variable, with modifiers  
44 such as high levels of the fetal  $\beta$  haemoglobin chain,  $\gamma$ , resulting in  $\alpha_2\gamma_2$  or  $\alpha_2\beta^S\gamma$  tetramers that  
45 terminate HbS polymers and ameliorate disease. Milder disease is also associated with  
46 compound heterozygosity of the sickle cell allele with quantitative defects in  $\alpha$  or  $\beta$  chains  
47 (thalassaemias) or other haemoglobin chain variants like haemoglobin C.

48  
49 SCD is characterized by a multi-system vasculopathy and haemolysis, which cause much  
50 morbidity and mortality, especially in Africa. The anaemia has been ascribed to abnormal  
51 physical properties of diseased red blood cells (RBCs), which interfere with their transit through  
52 the splenic and hepatic vasculatures, so stimulating phagocytic uptake by tissue macrophages (3).  
53 However, the observation that isolated macrophages take up SCD RBCs selectively *in vitro* (4)  
54 indicates the presence of disease-specific ligands, which remain uncharacterized. Heterozygosity  
55 for HbS, sickle cell trait (SCT), affects over 250 million individuals and is maintained in the  
56 population by conferring protection against severe malaria. The mechanism underlying this  
57 protection is not fully explained, but the mutation has long been known to prevent high levels of  
58 parasitaemia (5, 6). Yet under most conditions *in vitro*, the parasites grow equally well in SCT  
59 RBCs compared to those with normal haemoglobin (7, 8), implying that protection is due to

60 efficient immune clearance of infected SCT RBCs, and again raising questions as to the identity  
61 of the ligands responsible for mediating phagocytosis.

62

## 63 **Results**

64

### 65 **Red blood cells from patients with SCD express high mannose N-glycans on their surfaces**

66

67 We postulated these putative uptake ligands might be N-linked glycans, given the prominence of  
68 the glycocalyx on RBCs and the corresponding expression of lectins as key innate receptors on  
69 macrophages (9). A survey for surface ligands using a panel of plant lectins identified two panel  
70 members that bound preferentially to SCD RBC (Fig. 1a), *Galanthus nivalis* Agglutinin (GNA)  
71 and *Narcissus pseudonarcissus* Lectin (NPL). Binding was specific (Extended Data Table 1,  
72 Extended Data Figs. 1a-b, 2a) and both lectins were noted to have similar specificities for  
73 terminal mannose residues (Extended Data Fig. 1a) (10, 11). Microscopy with fluorescent GNA  
74 lectin revealed discrete patches on the surfaces of SCD (HbSS), but not healthy (HbAA), RBCs  
75 (Fig. 1b, Extended Data Fig. 1c, d). Glycomic analysis using mass spectrometry showed that  
76 SCD RBCs express N-linked high mannose glycans, hereafter high mannose glycans (Man<sub>5</sub>-  
77 <sub>9</sub>GlcNAc<sub>2</sub>; Fig. 1c), which are known ligands for phagocytosis by macrophages (9, 12) and  
78 therefore good candidates for mediating RBC uptake. High mannose glycans are also observed in  
79 the N-glycome profiles from HbAA RBC ghosts (Fig. 1c, Extended Data Fig. 3, Extended Data  
80 File 1). The proportions of high mannose glycans with respect to whole N-glycomes were not  
81 significantly different between sickle and healthy RBC ghosts (Extended Data Fig. 1e). The



82 marked difference between GNA binding on the cell surface of HbAA compared to HbSS RBCs  
83 is therefore not explained by the total high mannose glycan content of the ghosts.

84

### 85 **RBC surface mannose correlates with extravascular haemolysis in sickle cell disease**

86

87 To assess the relevance of high mannose N-glycan display for RBC uptake *in vivo*, we exploited  
88 the heterogeneity of SCD arising from the interactions of HbS with other mutations in the globin  
89 loci (such as HbC,  $\alpha$ - and  $\beta$ -thalassaemias) that also protect against malaria (13). If mannoses  
90 were phagocytic ligands in SCD, higher levels of mannose exposure should correlate with more  
91 severe anaemia. Despite a similar glycomic profile, RBCs from patients who were homozygous  
92 for HbS (HbSS) tended to exhibit higher binding of GNA lectin, compared to RBCs from healthy  
93 individuals containing HbAA or those with SCT (HbAS) (Fig. 2a). Patients with SCD who were  
94 compound heterozygotes for HbS and either HbC or  $\beta$ -thalassaemia, or who had HbSS but with  
95 mitigating  $\alpha$ -thalassaemia or high levels of HbF, tended to exhibit low to intermediate GNA  
96 lectin binding (Fig. 2a). RBCs in other anaemias did not express high levels of exposed mannose  
97 residues (Extended Data Fig. 2a). The classical apoptotic marker for phagocytosis,  
98 phosphatidylserine, as measured by annexin V binding, was expressed at similar, low levels on  
99 RBCs from each of the clinical groups (Extended Data Fig. 2b), although it was highly expressed  
100 on positive control calcium ionophore treated, eryptotic RBCs (Extended Data Fig. 2c). Overall,  
101 GNA lectin binding correlated significantly with more severe anaemia (Fig. 2b) and other  
102 markers of haemolysis (Extended Data Fig. 2d, e), consistent with high mannose N-glycan  
103 expression driving ‘extravascular’ uptake by hepatosplenic phagocytes, which is the major  
104 mechanism of haemolysis in SCD (14). A minor, but significant, proportion of RBC loss in SCD

105 is also accounted for by intravascular haemolysis (14). However, plasma lactate dehydrogenase  
106 (LDH) levels, a marker of intravascular haemolysis (14), did not correlate with RBC GNA lectin  
107 binding (Fig. 2c, d, e) within HbSS patients. We postulated that mannose binding lectin might  
108 bind and opsonize sickle cells, but no significant correlations between levels of this plasma  
109 protein and haemolytic phenotypes were observed (Extended Data Fig. 4a-c). Furthermore, when  
110 we added cells washed free of plasma to macrophages, SS, but not AA, RBCs were selectively  
111 taken up and this could be inhibited by mannan (Fig. 2f), indicating the macrophages expressed a  
112 receptor that interacted directly with surface mannoses.

113

114 **Surface mannoses can be induced on healthy RBC by oxidative stress and are recognized**  
115 **by the mannose receptor (CD206)**

116

117 High mannose N-glycans (Man<sub>5,9</sub>GlcNAc<sub>2</sub>) were detected in glycomic analyses of healthy  
118 (HbAA) RBCs (Fig 1c, Extended Data Fig. 3). Furthermore, permeabilization of healthy RBCs  
119 allowed GNA lectin binding in patches that colocalized with the membrane skeleton (Extended  
120 Data Fig. 5a). SCD is associated with intracellular oxidative stress (15, 16), so we determined  
121 whether exposing healthy RBCs to an oxidizing agent (Extended Data Fig. 5b) would alter the  
122 surface mannose exposure as assessed by GNA lectin binding (Fig. 3a). Under the experimental  
123 conditions applied, oxidation of healthy RBCs indeed resulted in binding of GNA lectin, with  
124 similar, but fewer, patches observed compared to unoxidized HbSS RBCs (Fig. 3b). Artefactual  
125 GNA lectin-binding resulting from permeabilization of the cell by oxidative damage was ruled  
126 out (Extended Data Fig. 5c), as was potential intracellular O-GlcNAc binding by GNA lectin  
127 (Extended Data Fig. 5d). To identify the cognate receptor on macrophages, we measured the

128 binding of a panel of recombinant mammalian C-type lectin fusion proteins with different glycan  
129 specificities to oxidized RBCs. This survey implicated the mannose receptor (17, 18) (MR,  
130 CD206), in particular the mannose recognizing carbohydrate recognition domain (MR-CRD)  
131 (Fig. 3c). We also observed that in cultures of oxidized RBCs with human monocyte derived  
132 macrophages (HMDM) *in vitro*, uptake was restricted to MR positive cells (Fig. 3d).  
133 Furthermore, siRNA knockdown of MR in macrophages (Extended Data Fig. 6c) specifically  
134 reduced phagocytosis (Fig. 3e, Extended Data Fig. 6d); and phagocytosis was also inhibited by  
135 the competing glycans mannan or chitin, each known to block MR-CRD (19), but not inhibited  
136 by the control glycan laminarin (Fig. 3f, Extended Data Fig. 6e). Finally, MR-CRD-blocking  
137 antibody also inhibited phagocytosis of both oxidized healthy and native SCD RBC (Fig. 3g, h),  
138 which was also sensitive to mannan and chitin (Fig. 3i). Taken together, these results  
139 demonstrate that phagocytosis of mannose-displaying RBC is dependent on MR, although  
140 involvement of other receptors cannot be excluded.

141

#### 142 **GNA lectin binding proteins comigrate with spectrin containing complexes**

143

144 The above data show that high mannose sugars occur in the glycomes of both HbAA and HbSS  
145 RBC, and that these sugars can be detected on the surface of HbSS RBC and oxidized HbAA  
146 RBC by GNA lectin binding. To identify the proteins carrying the high mannose sugars, extracts  
147 of HbAA and HbSS RBC membranes were analysed by western blots probed with GNA lectin.  
148 A GNA-binding doublet around 260kDa was identified in both HbAA and HbSS RBC (Fig. 4a),  
149 which is similar in molecular weight to the abundant membrane skeleton proteins  $\alpha$ - and  $\beta$ -  
150 spectrin. Blots of HbSS ghosts showed additional GNA lectin-binding bands at ~160kDa,

151 ~100kDa, ~70kDa and ~50kDa, which were not seen in fresh HbAA and HbAS RBC (Fig. 4a-b).  
152 When HbAA RBCs were stored for six weeks, to allow oxidative damage to membrane skeletal  
153 proteins (20), lower molecular weight Endo-H (N-glycan specific glycosidase) sensitive GNA  
154 lectin-binding bands corresponding in size to fragments seen in HbSS cells were seen on western  
155 blotting, and GNA lectin precipitation enriched these fragments (Extended Data Fig. 7a, b). The  
156 intensity of the 100kDa fragment was noted to correlate positively with RBC surface GNA lectin  
157 binding assessed by flow cytometry (Fig. 4b, Extended Data Fig. 7c), suggesting a role in the  
158 surface exposure of high mannose glycans. The specificity of the GNA lectin binding was  
159 confirmed by treating RBC ghosts with N-glycan specific glycosidases (PNGase F and Endo-H)  
160 prior to western blotting, which abolished GNA-binding to all of the above bands (Fig. 4c). We  
161 next attempted to determine whether treatment of RBC ghosts with N-glycanases reduced the  
162 sizes of GNA-binding bands. A molecular weight change was not observable for the high  
163 molecular weight doublet around 260kDa, although the large sizes of these proteins made minor  
164 shifts in difficult to observe. However, a ~70kDa band from HbSS ghosts did show an  
165 appropriate reduction in molecular weight, consistent with cleavage of N-glycans after treatment  
166 of RBC ghosts with PNGase F and Endo-H (Fig. 4d). Western blotting with antibodies to  $\beta$ -  
167 spectrin, indicated the band contained an epitope derived from spectrin.

168  
169 To investigate the association of spectrin with high mannose glycans species further, we carried  
170 out mass spectrometric analysis of tryptic peptides from the 260kDa GNA-binding doublet from  
171 both HbAA and HbSS RBC ghosts and found that both bands contained large quantities of  $\alpha$ -  
172 and  $\beta$ -spectrin (Extended Data Table 2). As has been previously reported in RBC proteomic  
173 experiments (21), other abundant RBC proteins of lower molecular weight were also identified,

174 including integral membrane glycoproteins such as Band 3 and Glut-1 (Extended Data Table 2).  
175 However, despite extensive mass spectrometric analyses from the 260 kDa doublet, no  
176 conventionally glycosylated peptides were identified.

177

178 Further evidence indicating covalent linkages between high mannose glycan containing  
179 glycoproteins/glycopeptides and spectrin derived peptides came from western blots of membrane  
180 extracts from HbSS RBC or HbAA ghosts treated with trypsin, which exhibited anti-spectrin  
181 binding lower molecular weight bands comigrating with GNA lectin signals (Extended Data Fig.  
182 7c, d), particularly marked for the 50kDa GNA-binding band and  $\alpha$ -spectrin antibodies. GNA  
183 lectin precipitation of extracts from HbAA ghosts followed by western blotting with antibodies  
184 to spectrin, detected a ~260 kDa protein (Fig. 4e). Finally, super resolution imaging of  
185 permeabilized HbAA and HbSS RBC demonstrated GNA lectin co-localising with spectrin in  
186 discrete patches scattered in the spectrin membrane skeletal network (Fig. 4f). Taken together  
187 these data support the hypothesis that spectrin containing complexes in HbSS and oxidized  
188 HbAA RBCs are N-glycosylated with high mannose glycans, although it was not possible to  
189 detect specific N-glycosylated peptides through conventional glycoproteomic approaches.

190

191 **GNA lectin binds to low molecular weight complexes that include spectrin, are protease**  
192 **resistant and derive from higher molecular weight aggregates**

193

194 In order to generate smaller fragments of high mannose-bearing fragments that would be more  
195 amenable to characterization, HbSS ghosts were incubated with serial dilutions of trypsin,  
196 spectrin was purified from them and then probed with GNA in western blots. This showed that

197 high concentrations of trypsin, sufficient to digest the 260kDa and 160kDa GNA lectin binding  
198 proteins, failed to degrade the ~50kDa, ~70kDa and ~100kDa GNA lectin binding gel bands  
199 (Fig. 4g and Extended Data Fig. 7e)). Indeed, the intensities of these bands, particularly that at  
200 ~100kDa, increased with higher trypsin concentrations (Fig. 4g). Prolonged, high concentration  
201 trypsin digestion eventually degraded the ~100kDa fragment, and, to some extent, the ~70kDa  
202 GNA lectin binding bands, with concurrent appearance of a new GNA lectin binding band  
203 around 40kDa, which we term F40 (Extended Data Fig. 7f). This same pattern of loss of the  
204 ~100kDa and ~70kDa GNA lectin binding fragments with concurrent appearance of F40 was  
205 also observed when HbSS erythrocytes were stored over five weeks (Extended Data Fig. 7g).  
206 Hence, protease digestion results in formation of a 40kDa protease-resistant fragment that binds  
207 GNA lectin and therefore carries high mannose glycans.

208

209 The F40 fragment was concentrated through sequential 100kDa and 10kDa cut-off concentrators  
210 (Extended Data Fig. 8a, b), and the resulting band cut out from a gel for glycoproteomic analysis.  
211 Proteomic analysis of F40 identified peptides from  $\alpha$ -spectrin, particularly the N-terminal 370  
212 amino acids (Fig. 4h, Extended Data Table 3). PNGase-F treatment of the purified F40 fragment  
213 released N-glycans consisting mainly of high mannoses (Man<sub>6</sub>-Man<sub>9</sub>) and complex structures  
214 (Extended Data Fig. 8c). However, once again, no specific glycopeptides could be identified. We  
215 postulated that the reason for this, and the relatively low identified protein sequence coverage,  
216 could be unconventional peptide structures arising from oxidized and glycated aggregates.  
217 Indeed, mass spectrometry confirmed the presence of lysine glycation in  $\alpha$ -spectrin peptides  
218 from F40 at amino acids K59, K270 and K281. Furthermore, although GNA lectin binding to  
219 F40 was Endo-H sensitive, the enzyme required denaturing conditions to be effective (Fig. 4i),

220 consistent with the possibility of protein aggregates. Additionally, the N-terminal  $\alpha$ -spectrin  
221 antibody, B12, failed to bind to the full-length F40 band, but bound to smaller fragments after  
222 treatment with a combination of proteases, indicating a cryptic epitope (Extended Data Fig. 8d, e,  
223 f). Finally, when visualized in 3D-SIM, some HbSS cells show large aggregates of intracellular  
224 spectrin, which correspond to dense GNA lectin surface staining (Fig. 4j). Overall, our data  
225 demonstrate the existence of high mannose glycans in HbSS RBC extracts and suggest that the  
226 main GNA lectin-binding molecules are spectrin-containing glycoprotein complexes with  
227 atypical structures, including glycosylated forms, that make analysis by conventional  
228 glycoproteomics challenging.

229

230 **Infection of RBCs with *P. falciparum* causes exposure of high mannose N-glycans,**  
231 **especially those from donors with SCT**

232

233 As infection of RBC with malarial parasites is associated with oxidative stress (22), we  
234 investigated whether exposure of high mannose N-glycans might be important in protection  
235 against infection with *P. falciparum*, particularly in the context of SCT. First, we determined the  
236 sensitivity of SCT RBCs to a given oxidative stress and found they bound more GNA lectin than  
237 HbAA RBC (Fig. 5a). Interestingly, the proportion of HbS correlated well with the degree of  
238 oxidative stress (Fig. 5b). These data suggested that exposure of high mannose N-glycans might  
239 contribute to the resistance of individuals with SCT to severe malaria, by enhancing clearance of  
240 infected cells. We therefore infected HbAA and HbAS RBC with *P. falciparum* and assessed  
241 high mannose N-glycan exposure as the infection progressed through ring, trophozoite and  
242 schizont stages. HbAA RBCs containing schizonts, but not trophozoites, expressed significantly

243 higher exposed high mannose N-glycans as indicated by increased GNA lectin binding (Fig. 5c).  
244 Importantly, HbAS RBCs containing schizonts expressed even higher levels of exposed high  
245 mannose N-glycans and this increased expression extended into the trophozoite stages (Fig. 5c).  
246 *P. falciparum* infected RBCs cytoadhere to vascular endothelium, to avoid phagocytosis by  
247 hepatosplenic macrophages (23, 24), and this adhesion is mediated by the expression of PfEMP1  
248 on late stage infected RBC (25). Reduced display of PfEMP1 on the surface of HbAS-infected  
249 RBCs is a potential mechanism of protection against malaria in SCT (26), and PfEMP1 levels  
250 show considerable variation in different HbAS donors (27). We therefore determined PfEMP1  
251 expression in addition to mannose display and noted a marked inverse correlation (Fig. 5d).

252

253

## 254 **Discussion**

255

256 This work has identified a novel receptor-ligand pair mediating RBC clearance that underlies  
257 both the extravascular haemolysis of SCD and clearance of *P. falciparum* infected  
258 RBCs. Immunologically, the latter can be regarded as protective immunity arising from  
259 recognition of altered self, with the mannose receptor recognizing a pattern common to both  
260 diseased and infected cells. Display of high mannose N-glycans on membrane proteins could  
261 also be regarded as a new damage-associated molecular pattern (DAMP). The mannose receptor  
262 is expressed in human spleens by Lyve-1+ cells lining venous sinuses, where they form a  
263 physical barrier for blood cells to exit the red pulp and so are ideally located to perform a  
264 filtering function (28). In infection with *P. falciparum*, the parasite evades passage through the  
265 spleen by expressing adhesive proteins, notably PfEMP1, on the surface of infected RBCs, so  
266 that they adhere to endothelial cells in the systemic circulation. The inverse correlation between



267 mannose exposure and surface PfEMP1 implies similar processes involving oxidation induced  
268 membrane skeletal rearrangements underlie both phenomena (29, 30). Reduced PfEMP1 in  
269 infected HbAS RBCs will lead to a failure of cytoadherence, and the exposed high mannose N-  
270 glycans on circulating infected RBC will induce clearance by hepatosplenic phagocytes.  
271 Together with the spleen's role in processing high mannose N-glycan bearing RBCs in SCD,  
272 these data are consistent with spleen being the primary organ in removing RBCs infected with  
273 malaria exposing high mannose N-glycans. Our work also potentially sheds light on the reasons  
274 why those with SCD are so susceptible to infections with encapsulated bacteria, especially  
275 *Streptococcus pneumoniae*, which is the commonest cause of death in children (1). Capsular  
276 polysaccharides from pneumococcus are known to bind the carbohydrate binding domains of the  
277 mannose receptor (31). It therefore seems likely that the high mannose N-glycans on the surfaces  
278 of sickle cells would compete with bacteria for uptake by the mannose receptor.  
279  
280 Our work has also identified a new phenomenon whereby complexes of membrane skeletal  
281 proteins, and fragments derived from them, are associated with high mannose N-glycans, which  
282 act as an eat me signal. There are still only two accepted eat me signals in higher eukaryotes,  
283 phosphatidylserine and calreticulin (32). This work therefore adds a third ligand to perform this  
284 role. The expression of ligands for uptake attached to the membrane skeleton would allow  
285 receptors on phagocytic cells to bind to molecules with high tensile strength, which may be  
286 important for capturing cells as they transit through the spleen under conditions of high shear  
287 stress.  
288

289 Protein aggregates are thought to form after attacks by free radicals, reactive oxygen and  
290 nitrogen species and glycation. These result in a wide variety of amino acid adducts (33), some  
291 of which mediate the cross-links thought to underlie the formation of aggregates. Complexes of  
292 damaged proteins, including spectrin, secondary to oxidative damage associated with haemolysis  
293 have long been recognized in RBCs (34-37), partly arising from interaction with free radicals  
294 generated by denatured haemoglobin species (hemichromes), including in SCD (38). Oxidative  
295 degradation has been shown to be one of the main causes of membrane skeletal protein  
296 alterations occurring in RBCs in storage, with proteolytic cleavage having a secondary role (20).  
297 Interestingly, spectrin containing species were detected either as low molecular weight fragments  
298 covering the N-terminus, as found in our proteomic analysis, or as high molecular aggregates  
299 (20). Oxidation during the storage period of RBCs has also been shown to inactivate  
300 glyceraldehyde 3-phosphate dehydrogenase, an important enzyme for ATP synthesis (20, 39). In  
301 turn, this leads to dissociation of spectrin from the phosphatidylserine molecules of the RBCs  
302 membrane, in an ATP dependent mechanism, resulting in increased spectrin-glycation products  
303 (40).

304

305 Therefore, either by directly acting on the cytoskeletal proteins, or indirectly through ATP  
306 dependent mechanisms, oxidative damage of RBCs is a mechanism that induces alterations in  
307 membrane protein organization leading to aggregation of membrane glycoproteins. This is in  
308 accordance with a recent report demonstrating that oxidative stress results in cluster-like  
309 structures on the membrane of RBCs as a result of possible reorganization and aggregation (41).  
310 RBCs contain various glycoproteins such as band 3, glycophorin, GLUT1, CD44 and CD47 (42).  
311 Therefore, the enhanced phagocytosis we describe could potentially be driven by the aggregation

312 of RBC membrane glycoproteins increasing the local concentration of high mannose N-glycans,  
313 thus favouring their recognition by the mannose receptor. This is in accordance with previous  
314 reports showing that the binding affinity of the mannose receptor increases with the density of  
315 mannose-containing glycoproteins (43). Taken together, we suggest that oxidative stress in RBCs  
316 induces glycoprotein reorganization and aggregation, resulting in increased high mannose glycan  
317 bearing densities that are recognized by the mannose receptor.

318

319 In summary, we describe a mechanism whereby oxidatively-damaged, membrane protein  
320 complexes display high mannose N-glycans, which act as eat me signals important in the  
321 haemolysis of sickle cell disease and resistance against severe malaria. It therefore represents the  
322 first unified mechanism to explain both advantageous and deleterious consequences of the sickle  
323 mutation.

## 324 **Methods**

### 325 *Donors*

326 Ethical approval was obtained for the study (North of Scotland REC Number 11/NS/0026).  
327 Further samples, including donors with SCT, were obtained from the NHS Grampian  
328 Biorepository scheme (application number TR000142). Discarded anonymized samples were  
329 also obtained from patients with SCD from King's College Hospital. HbAA, HbAS and SCD  
330 statuses were assessed by Hb HPLC (Tosoh G7). All samples from patients were collected into  
331 EDTA tubes (Becton-Dickinson).

### 332 *RBC isolation*

333 Blood was collected into acid citrate dextrose solution tubes (ACD; 455055, Grenier) and RBC  
334 isolated by sodium metrizoate density gradient centrifugation (1.077 g/ml, Lymphoprep;  
335 1114547 Axis-Shield). Packed RBC were diluted with an equal volume of Dulbecco's modified  
336 Eagle's medium (DMEM; 4.5 g/L glucose, L-glutamine; 41965, Gibco), stored in ACD (9 ml  
337 RBC/DMEM per ACD tube) at 4°C and used within 3 days unless otherwise stated.

### 338 *Lectins*

339 Biotinylated lectins were all purchased from Vector Laboratories. They include: *Galanthus*  
340 *nivalis* Agglutinin (GNA, B-1245, 4µg/ml), *Narcissus pseudonarcissus* Lectin (NPL, B-1375,  
341 4µg/ml), *Griffonia simplicifolia* Lectin II (G.Simp, B-1215, 4µg/ml), *Solanum tuberosum* Lectin  
342 (STL, B-1165, 20 ng/ml), *Aleuria aurantia* Lectin (AAL, B-1395, 33ng/ml), *Maackia amurensis*  
343 Lectin II (MAL II, B-1265, 67ng/ml), *Sophora japonica* Lectin (Vector Laboratories, no longer  
344 available, 1µg/ml). FITC conjugated Peanut agglutinin was purchased from Sigma-Aldrich  
345 (PNA, L7381-2MG, 2µg/ml).

346 *Flow cytometry*

347 Whole blood flow cytometry assays were used for Fig. 1a, 2, Extended Data Fig. 1a, 2, 3b, d, e  
348 and 8a. Whole blood was washed first in phosphate buffered saline (PBS). Purified RBC were  
349 used for the other flow cytometry experiments. RBC gating was applied by forward and side  
350 scatter gating of both whole blood and purified RBC flow cytometry experiments (Extended  
351 Data Fig. 9a). Staining with anti-glycophorin A (GPA) confirmed gates contained >99% RBC  
352 (data not shown).

353 For lectin flow cytometry, approximately  $5 \times 10^6$  RBC were washed three times in PBS, and  
354 incubated for 15 minutes at room temperature in calcium buffer (10mM HEPES, 150mM NaCl<sub>2</sub>,  
355 2.5mM CaCl<sub>2</sub>, pH 7.4) containing 10% Carbo-Free Blocking Solution (SP5040, Vector  
356 Laboratories) for whole blood flow cytometry or just buffer alone for purified RBC flow  
357 cytometry. Biotinylated lectin staining was carried out at room temperature in the same buffer as  
358 the initial blocking step. PNA-FITC and other antibody staining was carried out in PBS  
359 throughout, without contact with calcium buffer or Carbo-Free Blocking Solution. Lectin and  
360 antibody staining were carried out for 30 minutes at room temperature, protected from light.  
361 Annexin V staining was carried out according to the manufacturer's instructions (640945,  
362 Biologend). For biotinylated lectin staining, cells were then washed and incubated with  
363 streptavidin PE-Cy7 (0.27  $\mu$ g/ml; 25431782, eBioscience) or PE (0.67  $\mu$ g/ml; 554061, BD  
364 Pharmingen) for 30 minutes at room temperature. Humanized Fc fusions of murine C-type  
365 lectins (17, 44) (5  $\mu$ g/ml) were incubated with RBC for 30 minutes at room temperature in  
366 calcium buffer, then detected by Alexa Fluor 647 goat anti-human secondary antibody (2  $\mu$ g/ml;  
367 109-605-098, Jackson ImmunoResearch Laboratories). In tests of their specificity for binding  
368 RBC, lectin or Fc fusion proteins were first incubated with mannan (5 mg/ml, unless otherwise

369 stated) for 15 minutes at room temperature. Biotinylated BRIC 132 and BRIC 163 (10 µg/ml;  
370 9458B and 9410B, International Blood Group Reference Laboratory) and anti-O-GlcNAc (1  
371 µg/ml, RL2; 59624, Santa Cruz) binding to RBC were performed in PBS for 30 minutes at room  
372 temperature, before incubation with streptavidin secondary (for BRIC 132/163) or anti-mouse PE  
373 secondary (for anti-O-GlcNAc) for a further 30 minutes.  
374 Prior to intracellular staining, RBC were fixed with glutaraldehyde (0.05%, 10 minutes, room  
375 temperature), permeabilized with Triton X-100 (0.1% in PBS) for 5 minutes at room temperature  
376 and then washed in PBS. Cells were washed before cytometric analysis. Data were acquired on a  
377 FACSCalibur (BD) and analysed using FlowJo v10.0 (Treestar) software. Normalized geometric  
378 mean fluorescences (gMFI) were calculated by subtracting the gMFI of secondary  
379 antibody/streptavidin-only paired controls. For PNA-FITC and Annexin V analysis, unstained  
380 controls were used for gMFI normalization.

#### 381 *RBC ghost preparation*

382 Washed RBC were subjected to ice cold hypotonic lysis in 20 mM Tris, pH 7.6, with protease  
383 inhibitor (05056489001, Roche) (45). Lysates were washed three times in hypotonic lysis buffer  
384 (37000 g, 4°C, 30 minutes) before resuspension in minimal hypotonic lysis buffer. Protein  
385 concentrations were determined by protein BCA assay (23227, Pierce). No trypsinization was  
386 performed before any glycan analysis.

#### 387 *Glycomic mass spectrometry (MS)*

388 N-linked glycan analysis from RBC ghosts were performed according to Jang-Lee *et al.* (46). MS  
389 and MS/MS data from the permethylated purified glycan fractions were acquired on a 4800  
390 MALDI-TOF/TOF mass spectrometer (Applied Biosystems). Data were processed using Data  
391 Explorer 4.9 Software (Applied Biosystems). The processed spectra were subjected to manual

392 assignment and annotation with the aid of a glycoinformatics tool, GlycoWorkBench (47).  
393 Proposed assignments for the selected peaks were based on  $^{12}\text{C}$  isotopic composition together  
394 with knowledge of the biosynthetic pathways, and structures were confirmed by data obtained  
395 from MS/MS experiments.

### 396 *Proteomics*

397 RBC ghost membranes were subjected to SDS-PAGE (10% Bis-Tris gel with MOPS running  
398 buffer). SDS-gel bands a were excised, sliced into small pieces, and destained with 200  $\mu\text{L}$  of 1:1  
399 v:v acetonitrile:ammonium bicarbonate (50 mM, pH 8.4; AMBIC). Destained gel pieces were  
400 then reduced by treatment with 10 mM DTT in AMBIC at 56 °C for 30 min, carboxymethylated  
401 in 55 mM iodoacetic acid in AMBIC in the dark at room temperature, and then subjected to  
402 overnight sequencing grade modified trypsin (Promega V5111) digestion in AMBIC at 37 °C.  
403 After enzyme inactivation (100 °C water bath, 3 min), the digested peptides were extracted twice  
404 from the gel pieces by incubating sequentially (15 min with vortexing) with 0.1% trifluoroacetic  
405 acid and 100% acetonitrile. Finally, the volume was reduced with a Speed Vac. Eluted peptides  
406 were analysed by LC-MS using a NanoAcquity UPLC™ system coupled to a Synapt™ G2-S  
407 mass spectrometer (Waters MS Technologies, Manchester, UK) in positive ion mode. 5  $\mu\text{L}$  of  
408 sample was injected onto the analytical column (Waters, HSS T3, 75  $\mu\text{m}$   $\times$  150 mm, 1.8  $\mu\text{m}$ ).  
409 Peptides were eluted according to the following linear gradient program (A: 0.1% v/v formic  
410 acid in water, B: 0.1% v/v formic acid in acetonitrile): 0-90 min, 3-50% of B. MS data were  
411 acquired on the Synapt G2-S using a data-dependent acquisition program, calibrated using Leu-  
412 Enkephalin peptide standard. The top 20 components were selected for MS/MS acquisition.  
413 Identification of the eluted peptides was performed using ProteinLynx Global SERVER™ v3.03  
414 (Waters) using human porcine trypsin database (Uniprot 1.0). The following were set as

415 workflow parameters on PLGS: fixed carboxymethyl modification for cysteine, variable  
416 deamidation and oxidation modifications for glutamine and methionine respectively.

417 *Human monocyte-derived macrophage (HMDM) preparation and culture*

418 Mononuclear cells were isolated by density centrifugation from whole blood and seeded at  $10^6$   
419 cells/ml in Roswell Park Memorial Institute medium (RPMI (21875-034, Gibco)), 100 U/ml  
420 penicillin, 100  $\mu$ g/ml streptomycin, 292  $\mu$ g/ml L-glutamine (10378-016, Gibco) and 10% heat  
421 inactivated autologous serum. Cultures were incubated at 37°C with 5% CO<sub>2</sub> for 14-21 days.  
422 Cells were washed with RPMI three times prior to use.

423 *Phagocytosis Assay*

424 For identification of phagocytosis by microscopy, RBC were stained with Cell Trace Far Red  
425 (CTFR) (C34564, Molecular Probes) according to the manufacturer's instructions with minor  
426 alterations: CTFR was diluted at 1 in 500 (2  $\mu$ l/ml) in RPMI with penicillin and streptomycin  
427 (RPMI/PS) media and incubated with 20  $\mu$ l packed RBC for 30 minutes at 37°C, after which  
428 staining was inhibited by adding 10% FCS (10270-106, Gibco). Stained cells were washed in  
429 RPMI/PS prior to counting and addition to macrophages. RBC were added to HMDM at  $5 \times 10^7$   
430 cells per well for 3 hours, before removal of cells, washing and fixation with 4%  
431 paraformaldehyde (Extended Data Fig. 6a). RBC bound, but not ingested, by HMDM were then  
432 stained with anti-glycophorin-FITC (HIR2 antibody; 306610, Biolegend). Cells were imaged  
433 using an immunofluorescence microscope (Zeiss AxioObserver Z1). Phagocytic macrophages  
434 were defined as containing at least one CTFR-positive GPA-FITC-negative RBC (determined by  
435 bright field). Three examples of oxidized RBC phagocytosis are shown in Extended Data Fig.  
436 6b, marked 'P'. RBC-binding macrophages were defined as associated with at least one  
437 glycophorin-FITC/CTFR double positive RBC. Analysis of HMDM phagocytosis included only



438 the small, non-granular subset of macrophages, because of consistent association with  
439 phagocytosis and binding of RBC. For quantification of phagocytosis, 200-500 such  
440 macrophages were counted per treatment. To test specificity of HMDM recognition, the  
441 polymers mannan (10 mg/ml; M-7504, Sigma-Aldrich), chitin (50 µg/ml; C9752, Sigma-  
442 Aldrich) or laminarin (10 mg/ml; L9634, Sigma-Aldrich), or anti-CD206 blocking antibody (10  
443 µg/ml clone 15.2 321102, BioLegend; isotype control mouse IgG1 kappa clone 107.3; 554721,  
444 BD Biosciences) were added to cultures 60 minutes before phagocytosis assays. Coumarin-  
445 stained 6 µm Fluoresbrite carboxylate microspheres, of similar size to RBC, were used to assess  
446 RBC independent phagocytosis (Extended Data Fig. 6e).

#### 447 *RBC oxidation and eryptosis*

448 Purified RBC were incubated for 60 or 30 minutes respectively with 0.2 mM copper sulphate and  
449 5 mM ascorbic acid at 37°C in DMEM with 4.5 g/L glucose. Cells were washed in PBS 3 times  
450 prior to use. To induce eryptosis, calcium ionophore (2µM, A23187, Sigma-Aldrich) was applied  
451 at 37°C in DMEM, with 4.5 g/L glucose, to purified RBC for 3 hours.

#### 452 *Reactive Oxygen Species (ROS) Production*

453 The rate of ROS production was determined by first loading purified oxidized or untreated RBC  
454 with oxidation sensitive dye CM-H2DCFDA (10 µM; C6827, Molecular Probes) in PBS and  
455 incubating for 60 minutes in the dark at 37°C. RBC were then washed three times, resuspended  
456 in DMEM and fluorescence determined immediately by spectrofluorimeter (Fluostar Optima;  
457 BMG Labtech) with excitation of 485 nm and emission 530 nm. The rate of ROS formation was  
458 calculated for the linear portion of the fluorescence/time curve generated over six hours, which  
459 typically lasted for three hours.

#### 460 *Lectin/Immuno-blotting*

461 Ghost preparations were mixed in equal volumes with SDS sample buffer containing 8M urea  
462 (45) and heated at 100°C for 10 minutes. Ghost protein samples were fractionated by gel  
463 electrophoresis using NuPage 4-12% Bis-Tris gel (Invitrogen, NP0312BOX) and transferred by  
464 western blotting (30V, 1 hour) to polyvinylidene fluoride membrane (P 0.45 µm; 10600023  
465 Amersham Hybond, GE Healthcare). Blots were probed with biotinylated GNA lectin (40 µg/ml;  
466 B1245, Vector Laboratories) and Streptavidin HRP (1:2500 dilution, 3999S, Cell Signalling) in  
467 calcium binding buffer (10mM HEPES, 150mM NaCl<sub>2</sub>, 2.5mM CaCl<sub>2</sub>, pH 7.4) containing 1x  
468 Carbo-Free Blocking Solution (Vector Laboratories, SP-5040) and protease inhibitor cocktail  
469 (11836145001, Roche) before development in Amersham ECL Select substrate (RPN2235, GE  
470 Healthcare). 0.1% Tween-20 was added in probing and washing steps. Loading of wells was  
471 normalized by protein concentration (~6 µg per sample). Enzymes PNGase F (P0704S, New  
472 England Biolabs) and Endo-Hf (P0703L, New England Biolabs) were used according to the  
473 manufacturer's instructions to treat RBC ghost samples prior to electrophoresis.

#### 474 *Lectin precipitation*

475 RBC ghosts were suspended in equal volumes of calcium binding buffer containing 2% Triton  
476 X-100, pre-cleared with magnetic streptavidin beads (88816, Pierce) and incubated with  
477 biotinylated GNA lectin (1 mg/ml; B1245, Vector Laboratories), biotinylated MAL-II lectin (1  
478 mg/ml; B1265, Vector Laboratories) or buffer only overnight at 4°C. Precipitation with magnetic  
479 streptavidin beads was performed in binding buffer and the beads washed with binding buffer  
480 containing 0.1% Triton X-100. Washed precipitates were denatured at 100°C for 10 minutes and  
481 supernatants loaded for gel electrophoresis and blotting. Blots were probed with anti-spectrin  
482 antibody (1 in 20,000 dilution; S3396, Sigma-Aldrich) and anti-mouse-HRP secondary antibody

483 (1 in 10,000 dilution, 5887, Abcam). PBS/0.1% Tween 20 replaced calcium binding buffer for  
484 lectin blotting.

#### 485 *Spectrin purification*

486 Spectrin was purified following the method of Ungewickell *et al.* with slight modifications (48).  
487 Briefly, the ghosts were washed twice and resuspended in 3 volumes of 37°C pre-warmed  
488 sodium phosphate (0.3 mM, pH 7.2) (extraction buffer) and incubated for 20 min at 37°C. The  
489 fragmented ghosts were pelleted by centrifugation at 40000g for 1 hour at 2°C. Supernatant was  
490 used as spectrin preparation for analysis.

#### 491 *Serial trypsin dilution treatment of spectrin*

492 Spectrin preparations or ghosts were analysed for protein content by BCA assay. Titrations of  
493 trypsin at concentrations as a fraction of sample concentration were applied for one hour or  
494 longer if indicated, at 37°C. No trypsin addition was applied to the untreated sample, which was  
495 also incubated for the same duration. Samples were all heat inactivated at 100°C for 10 minutes,  
496 after diluting with 8M urea sample buffer at a 1:1 ratio.

#### 497 *Chymotrypsin and pepsin digestions*

498 Chymotrypsin and pepsin were applied at 1:5 dilution in sample. Combinatorial protease  
499 treatment over 48 hours were performed with heat inactivation for 100°C, 10 minutes at 24  
500 hours. During pepsin treatment, sample was pre-diluted 1:1 with HCl, pH2.0. Acid was  
501 neutralized with NaOH after 24 hours, prior to addition of other proteases.

#### 502 *Isolation of trypsin resistant sickle fragment (TRSF)(F40)*

503 Approximately 20ml of HbSS ghosts, having been washed with low cold salt extraction buffer  
504 (0.3M sodium phosphate, pH 7.6), was treated with 1:5 trypsin: sample ratio overnight. Heat  
505 inactivation at 100°C was carried out for 10 minutes. Supernatant was harvested and further

506 centrifuged to remove insoluble products. Clarified supernatant was subsequently concentrated  
507 with a 100kDa cut-off concentrator (Pierce, Thermo Fisher, 88533) and supernatant applied to  
508 and concentrated with a 10kDa cut-off concentrator to approximately 500 $\mu$ l.

509 *Mass spectrometry glycomic analysis of TRSF*

510 Urea containing sample buffer, as above, was applied to TRSF. Coomassie bands corresponding  
511 to 40-44kD region were cut and analysed in three segments: 39-40kD, 41-42kD and 43-44kD.

512 *Dual colour western*

513 Amersham western blotting machines was used to detect GNA lectin and anti-spectrin binding  
514 using Cy3 and Cy5 conjugated reagents. Data were acquired and analysed by Amersham's  
515 inbuilt software.

516 *Immunofluorescence microscopy*

517 Cell surface GNA lectin binding for immunofluorescence was performed as for flow cytometry  
518 with minor alterations ( $10^7$  cells per test, 8  $\mu$ g/ml GNA lectin, 1  $\mu$ g/ml Streptavidin PE. For Fig.  
519 1b and Extended Data Fig.1c and 1d, 8  $\mu$ g/ml GNA lectin and 1  $\mu$ g/ml Streptavidin PE were pre-  
520 complexed overnight). Intracellular GNA lectin binding followed fixation (0.005%  
521 glutaraldehyde/PBS, 10 minutes, room temperature) and permeabilization (0.1% Triton-X  
522 100/PBS, 15 minutes, room temperature). Stained cells were pulse centrifuged ( $\leq 300g$ ) for 30  
523 seconds (including acceleration), in 24 well, flat bottom tissue culture plates (Greiner). To stain  
524 CD206, cells were blocked for 15 minutes with 1% BSA/PBS at room temperature in the dark  
525 and incubated with Alexa-488 conjugated anti-mannose receptor antibody (1.25  $\mu$ g/ml, Clone  
526 19.2; 53-2069-47, eBiosciences). DAPI (as per manufacturer's instructions; D1306, Thermo  
527 Fisher) staining was applied to cells post fixation/permeabilization for 30 minutes at room  
528 temperature. Cells were washed in PBS and imaged at 32x magnification using an

529 immunofluorescence microscope (Zeiss AxioObserver Z1). Images were analysed by Zen (Black  
530 and Blue versions, Zeiss).

531 *siRNA knockdown of mannose receptor*

532 Human mannose receptor (CD206) siRNA (UACUGUCGCAGGUAUCAUCCA) or a non-  
533 targeting siRNA sequence control (4390843, Life Technologies) were transfected into HMDM  
534 (RNAiMax, Life Technologies) (n = 4 donors for all siRNA experiments). Knockdown  
535 efficiency was established by determining mannose receptor expression by microscopy using  
536 CD206-Alexa-488 staining (described above) in the small non-granular macrophage sub-  
537 population by merging bright field and mannose receptor fluorescence staining. Knockdown  
538 efficiency was typically 65-85% (Extended Data Fig. 6c).

539 *Confocal microscopy for RBCs*

540 For spectrin-GNA lectin double staining experiments, permeabilized RBCs were stained with  
541 anti-human spectrin antibody (1 in 50 dilution; S3396, Sigma Aldrich) concurrently with GNA  
542 lectin (8 µg/ml) in calcium buffer. Alexa Fluor 647 anti-mouse antibody (10 µg/ml; A31571,  
543 Thermo Fisher) was applied in conjunction with streptavidin PE (1 µg/ml; Beckman Dickinson)  
544 following staining of primary reagents. RBCs were gravity sedimented (30 minutes at room  
545 temperature, in the dark) onto poly-L-lysine (Sigma Aldrich) treated 8 well chamber slides  
546 (LabTek). Images were acquired by a Zeiss LSM 710 microscope.

547 *3D-Structured Illumination Microscopy (3DSIM)*

548 GNA lectin/anti-spectrin stained RBCs were gravity sedimented onto poly-L-lysine treated  
549 chamber slides (LabTek). 3DSIM images were acquired on a N-SIM (Nikon Instruments, UK)  
550 using a 100x 1.49NA lens and refractive index matched immersion oil (Nikon Instruments).  
551 Samples were imaged using a Nikon Plan Apo TIRF objective (NA 1.49, oil immersion) and an

552 Andor DU-897X-5254 camera using 561 and 640nm laser lines. Z-step size for Z stacks was set  
553 to 0.120  $\mu\text{m}$ , as required by the manufacturer's software. For each focal plane, 15 images (5  
554 phases, 3 angles) were captured with the NIS-Elements software. SIM image processing,  
555 reconstruction and analysis were carried out using the N-SIM module of the NIS-Element  
556 Advanced Research software. Images were checked for artefacts using SIMcheck software  
557 (<http://www.micron.ox.ac.uk/software/SIMCheck.php>). Images were reconstructed using NiS  
558 Elements software v4.6 (Nikon Instruments, Japan) from a Z stack comprising  $\geq 1\mu\text{m}$  of optical  
559 sections. In all SIM image reconstructions, the Wiener and Apodization filter parameters were  
560 kept constant. Reconstructed SIM images were rendered in 3 dimensions using Imaris (Bitplane).  
561 Intracellular GNA lectin and anti-spectrin staining of healthy RBCs was performed following  
562 fixation and permeabilization. In order to co-localize surface GNA lectin with intracellular  
563 spectrin, SCD RBCs were stained with GNA lectin/streptavidin-PE staining before, and anti-  
564 spectrin/donkey anti-mouse Alexa 647 after, fixation and permeabilization.

565

566 *P. falciparum* culture in RBCs of different genotypes and flow cytometry analysis

567 *P. falciparum* IT/FCR3 parasites were cultured at 2% haematocrit in supplemented RPMI as  
568 described (49). Mature trophozoite-infected erythrocytes were purified to >90% parasitaemia by  
569 magnetic separation with a MACS CS column (Miltenyi Biotec, Germany) (50). The purified  
570 infected erythrocytes were used to infect RBCs of different genotypes with a starting  
571 parasitaemia of approximately 0.5%. RBCs were used within 10 days post-bleed, typically 3-5  
572 days. Cultures were gassed with 1% oxygen, 3% carbon dioxide and 96% nitrogen, then  
573 incubated at 37°C for 48-72 hours. After one cycle of invasion and growth, flow cytometry was  
574 used to assess parasitaemia and parasite maturation (51), as well as GNA lectin -binding and

575 PfEMP1 antibody staining. This method uses internally controlled flow cytometry analysis to  
576 separate uninfected red cells, ring-stage, trophozoite and schizont stage parasites within the same  
577 culture by FACS gating, using a pair of DNA- and RNA-binding dyes (Extended Data Fig. 9b,  
578 c). Hypoxia-induced reduction in parasite invasion and growth was observed in HbAS red cells,  
579 as described by Archer *et al.* (8). However, a range of parasite stages was available within each  
580 culture to allow investigation of high mannose exposure as parasites matured through the blood  
581 stage cycle.

582 For flow cytometry, infected erythrocytes in binding buffer (10mM HEPES, 150mM NaCl,  
583 2.5mM CaCl<sub>2</sub>, pH 7.4) were stained with Vybrant Violet (Thermo Fisher, V35003, 2.5µM) and  
584 ethidium bromide (Sigma-Aldrich, 46067-50ml-F, 1% in dH<sub>2</sub>O). Biotinylated GNA lectin  
585 staining was performed as described above. Streptavidin APC was used to detect biotinylated  
586 GNA lectin. A BD LSRFortessa (BD Biosciences) was used for flow cytometry and  
587 compensation between channels was carried out prior to the experiment. Relative GNA lectin  
588 binding was calculated for ring, trophozoite and schizont gates by dividing the gMFI for each  
589 gate by the value measured in the uninfected RBC gate. PfEMP1 expression was assessed using  
590 a rabbit polyclonal antibody raised against the N-terminal region (DBLαCIDR didomain) of the  
591 predominant PfEMP1 variant expressed in the culture (ITvar70, also known as AFBR6) (52), as  
592 described previously (53). The staining with PfEMP1 antibody (purified total IgG at 10 µg/ml for  
593 30 mins, followed by APC-conjugated goat anti-rabbit Alexa 647 (Invitrogen, A21244, 2 µg/ml))  
594 was compared to rabbit IgG control antibody (10 µg/ml, total IgG from a non-immunized rabbit,  
595 followed by secondary antibody as above). Normalized PfEMP1 gMFI was calculated by  
596 subtracting gMFI for rabbit IgG control antibody staining from that of the PfEMP1 antibody  
597 staining. Relative PfEMP1 expression for all samples is expressed as a percentage of the average

598 HbAA schizont PfeMP1 expression per experiment, which typically contained three HbAA  
599 samples.

#### 600 *Statistical analysis*

601 Most data are treated as non-parametrically distributed and presented with medians and  
602 interquartile ranges, with the exception of Fig. 5c, where means and standard deviations are  
603 shown. Statistical significance was assessed by either two-tailed Mann-Whitney (non-paired  
604 data) or two-tailed Wilcoxon signed rank tests (paired data). Multiple comparisons between  
605 stages of RBC infection by *P. falciparum* were analysed by ANOVA. All calculations were  
606 implemented in Prism version 5.04 (GraphPad Software).

607

#### 608 **Data Availability**

609 The authors declare that the data supporting the findings of this study are available within the  
610 paper and its supplementary information files. Further data are available from the corresponding  
611 author upon reasonable request.

612



- 613  
614  
615
- 616  
617
- 618  
619
- 620  
621
- 622  
623
- 624  
625
- 626  
627  
628
- 629  
630  
631
- 632  
633
- 634  
635  
636
- 637  
638  
639
- 640  
641
- 642  
643
- References
1. Piel FB, Steinberg MH, Rees DC. Sick cell Disease. *N Engl J Med*. 2017 April 20;376(16):1561-73.
  2. Rees DC, Williams TN, Gladwin MT. Sick-cell disease. *Lancet*. 2010 December 11;376(9757):2018-31.
  3. Brousse V, Buffet P, Rees D. The spleen and sick cell disease: the sick(led) spleen. *Br J Haematol*. 2014 July 01;166(2):165-76.
  4. Hebbel RP, Miller WJ. Phagocytosis of sick erythrocytes: immunologic and oxidative determinants of hemolytic anemia. *Blood*. 1984 September 01;64(3):733-41.
  5. ALLISON AC. Protection afforded by sick cell trait against subtertian malarial infection. *Br Med J*. 1954 February 06;1(4857):290-4.
  6. Luzzatto L. Sick cell anaemia and malaria. *Mediterr J Hematol Infect Dis*. 2012;4(1):e2012065.
  7. Ayi K, Turrini F, Piga A, Arese P. Enhanced phagocytosis of ring-parasitized mutant erythrocytes: a common mechanism that may explain protection against falciparum malaria in sick cell trait and beta-thalassemia trait. *Blood*. 2004 November 15;104(10):3364-71.
  8. Archer NM, Petersen N, Clark MA, Buckee CO, Childs LM, Duraisingh MT. Resistance to *Plasmodium falciparum* in sick cell trait erythrocytes is driven by oxygen-dependent growth inhibition. *Proc Natl Acad Sci U S A*. 2018 July 10;115(28):7350-5.
  9. Brown GD, Crocker PR. Lectin Receptors Expressed on Myeloid Cells. *Microbiol Spectr*. 2016 October 01;4(5):10.1128/microbiolspec.MCHD-0036.
  10. Shibuya N, Goldstein IJ, Van Damme EJ, Peumans WJ. Binding properties of a mannose-specific lectin from the snowdrop (*Galanthus nivalis*) bulb. *J Biol Chem*. 1988 January 15;263(2):728-34.
  11. Kaku H, Van Damme EJ, Peumans WJ, Goldstein IJ. Carbohydrate-binding specificity of the daffodil (*Narcissus pseudonarcissus*) and amaryllis (*Hippeastrum hybr.*) bulb lectins. *Arch Biochem Biophys*. 1990 June 01;279(2):298-304.
  12. Erwig LP, Gow NA. Interactions of fungal pathogens with phagocytes. *Nat Rev Microbiol*. 2016 March 01;14(3):163-76.
  13. Weatherall, D J & Clegg. *The Thalassemia Syndromes*. 4th ed. Blackwell Science Ltd; 2008.

- 644 14. Kato GJ, Steinberg MH, Gladwin MT. Intravascular hemolysis and the pathophysiology of  
645 sickle cell disease. *J Clin Invest*. 2017 March 01;127(3):750-60.
- 646 15. Chirico EN, Pialoux V. Role of oxidative stress in the pathogenesis of sickle cell disease.  
647 *IUBMB Life*. 2012 January 01;64(1):72-80.
- 648 16. Niihara Y, Miller ST, Kanter J, Lanzkron S, Smith WR, Hsu LL, et al. A Phase 3 Trial of l-  
649 Glutamine in Sickle Cell Disease. *N Engl J Med*. 2018 July 19;379(3):226-35.
- 650 17. Linehan SA, Martinez-Pomares L, da Silva RP, Gordon S. Endogenous ligands of  
651 carbohydrate recognition domains of the mannose receptor in murine macrophages, endothelial  
652 cells and secretory cells; potential relevance to inflammation and immunity. *Eur J Immunol*.  
653 2001 June 01;31(6):1857-66.
- 654 18. Martinez-Pomares L. The mannose receptor. *J Leukoc Biol*. 2012 December 01;92(6):1177-  
655 86.
- 656 19. Wagener J, Malireddi RK, Lenardon MD, Koberle M, Vautier S, MacCallum DM, et al.  
657 Fungal chitin dampens inflammation through IL-10 induction mediated by NOD2 and TLR9  
658 activation. *PLoS Pathog*. 2014 April 10;10(4):e1004050.
- 659 20. D'Amici GM, Rinalducci S, Zolla L. Proteomic analysis of RBC membrane protein  
660 degradation during blood storage. *J Proteome Res*. 2007 August 01;6(8):3242-55.
- 661 21. Murphy SC, Samuel BU, Harrison T, Speicher KD, Speicher DW, Reid ME, et al.  
662 Erythrocyte detergent-resistant membrane proteins: their characterization and selective uptake  
663 during malarial infection. *Blood*. 2004 March 01;103(5):1920-8.
- 664 22. Percario S, Moreira DR, Gomes BA, Ferreira ME, Goncalves AC, Laurindo PS, et al.  
665 Oxidative stress in malaria. *Int J Mol Sci*. 2012 December 03;13(12):16346-72.
- 666 23. Del Portillo HA, Ferrer M, Brugat T, Martin-Jaular L, Langhorne J, Lacerda MV. The role of  
667 the spleen in malaria. *Cell Microbiol*. 2012 March 01;14(3):343-55.
- 668 24. Safeukui I, Correias JM, Brousse V, Hirt D, Deplaine G, Mule S, et al. Retention of  
669 *Plasmodium falciparum* ring-infected erythrocytes in the slow, open microcirculation of the  
670 human spleen. *Blood*. 2008 September 15;112(6):2520-8.
- 671 25. Wahlgren M, Goel S, Akhouri RR. Variant surface antigens of *Plasmodium falciparum* and  
672 their roles in severe malaria. *Nat Rev Microbiol*. 2017 August 01;15(8):479-91.
- 673 26. Cholera R, Brittain NJ, Gillrie MR, Lopera-Mesa TM, Diakite SA, Arie T, et al. Impaired  
674 cytoadherence of *Plasmodium falciparum*-infected erythrocytes containing sickle hemoglobin.  
675 *Proc Natl Acad Sci U S A*. 2008 January 22;105(3):991-6.

- 676 27. Opi DH, Uyoga S, Orori EN, Williams TN, Rowe JA. Red blood cell complement receptor  
677 one level varies with Knops blood group, alpha(+)thalassaemia and age among Kenyan children.  
678 *Genes Immun.* 2016 April 01;17(3):171-8.
- 679 28. Martinez-Pomares L, Hanitsch LG, Stillion R, Keshav S, Gordon S. Expression of mannose  
680 receptor and ligands for its cysteine-rich domain in venous sinuses of human spleen. *Lab Invest.*  
681 2005 October 01;85(10):1238-49.
- 682 29. Cyrklaff M, Sanchez CP, Kilian N, Bisseye C, Simpore J, Frischknecht F, et al. Hemoglobins  
683 S and C interfere with actin remodeling in Plasmodium falciparum-infected erythrocytes.  
684 *Science.* 2011 December 02;334(6060):1283-6.
- 685 30. Cyrklaff M, Srismith S, Nyboer B, Burda K, Hoffmann A, Lasitschka F, et al. Oxidative  
686 insult can induce malaria-protective trait of sickle and fetal erythrocytes. *Nat Commun.* 2016  
687 November 08;7:13401.
- 688 31. Zamze S, Martinez-Pomares L, Jones H, Taylor PR, Stillion RJ, Gordon S, et al. Recognition  
689 of bacterial capsular polysaccharides and lipopolysaccharides by the macrophage mannose  
690 receptor. *J Biol Chem.* 2002 November 01;277(44):41613-23.
- 691 32. Li W. Eat-me signals: keys to molecular phagocyte biology and "appetite" control. *J Cell*  
692 *Physiol.* 2012 April 01;227(4):1291-7.
- 693 33. Davies MJ. Protein oxidation and peroxidation. *Biochem J.* 2016 April 01;473(7):805-25.
- 694 34. Fibach E, Rachmilewitz E. The role of oxidative stress in hemolytic anemia. *Curr Mol Med.*  
695 2008 November 01;8(7):609-19.
- 696 35. Kriebardis AG, Antonelou MH, Stamoulis KE, Economou-Petersen E, Margaritis LH,  
697 Papassideri IS. Progressive oxidation of cytoskeletal proteins and accumulation of denatured  
698 hemoglobin in stored red cells. *J Cell Mol Med.* 2007 February 01;11(1):148-55.
- 699 36. Snyder LM, Leb L, Piotrowski J, Sauberman N, Liu SC, Fortier NL. Irreversible spectrin-  
700 haemoglobin crosslinking in vivo: a marker for red cell senescence. *Br J Haematol.* 1983 March  
701 01;53(3):379-84.
- 702 37. Snyder LM, Fortier NL, Trainor J, Jacobs J, Leb L, Lubin B, et al. Effect of hydrogen  
703 peroxide exposure on normal human erythrocyte deformability, morphology, surface  
704 characteristics, and spectrin-hemoglobin cross-linking. *J Clin Invest.* 1985 November  
705 01;76(5):1971-7.
- 706 38. Nur E, Biemond BJ, Otten HM, Brandjes DP, Schnog JJ, CURAMA Study Group. Oxidative  
707 stress in sickle cell disease; pathophysiology and potential implications for disease management.  
708 *Am J Hematol.* 2011 June 01;86(6):484-9.

- 709 39. Reisz JA, Wither MJ, Dzieciatkowska M, Nemkov T, Issaian A, Yoshida T, et al. Oxidative  
710 modifications of glyceraldehyde 3-phosphate dehydrogenase regulate metabolic reprogramming  
711 of stored red blood cells. *Blood*. 2016 September 22;128(12):e32-42.
- 712 40. Manno S, Mohandas N, Takakuwa Y. ATP-dependent mechanism protects spectrin against  
713 glycation in human erythrocytes. *J Biol Chem*. 2010 October 29;285(44):33923-9.
- 714 41. Sinha A, Chu TT, Dao M, Chandramohanadas R. Single-cell evaluation of red blood cell bio-  
715 mechanical and nano-structural alterations upon chemically induced oxidative stress. *Sci Rep*.  
716 2015 May 07;5:9768.
- 717 42. Aoki T. A Comprehensive Review of Our Current Understanding of Red Blood Cell (RBC)  
718 Glycoproteins. *Membranes (Basel)*. 2017 September 29;7(4):10.3390/membranes7040056.
- 719 43. Hoppe CA, Lee YC. The binding and processing of mannose-bovine serum albumin  
720 derivatives by rabbit alveolar macrophages. Effect of the sugar density. *J Biol Chem*. 1983  
721 December 10;258(23):14193-9.
- 722 44. McGreal EP, Rosas M, Brown GD, Zamze S, Wong SY, Gordon S, et al. The carbohydrate-  
723 recognition domain of Dectin-2 is a C-type lectin with specificity for high mannose.  
724 *Glycobiology*. 2006 May 01;16(5):422-30.
- 725 45. Barker RN, Casswell KM, Reid ME, Sokol RJ, Elson CJ. Identification of autoantigens in  
726 autoimmune haemolytic anaemia by a non-radioisotope immunoprecipitation method. *Br J*  
727 *Haematol*. 1992 September 01;82(1):126-32.
- 728 46. Jang-Lee J, North SJ, Sutton-Smith M, Goldberg D, Panico M, Morris H, et al. Glycomic  
729 profiling of cells and tissues by mass spectrometry: fingerprinting and sequencing  
730 methodologies. *Methods Enzymol*. 2006;415:59-86.
- 731 47. Ceroni A, Maass K, Geyer H, Geyer R, Dell A, Haslam SM. GlycoWorkbench: a tool for the  
732 computer-assisted annotation of mass spectra of glycans. *J Proteome Res*. 2008 April  
733 01;7(4):1650-9.
- 734 48. Ungewickell E, Gratzner W. Self-association of human spectrin. A thermodynamic and kinetic  
735 study. *Eur J Biochem*. 1978 August 01;88(2):379-85.
- 736 49. Corrigan RA, Rowe JA. Strain variation in early innate cytokine induction by *Plasmodium*  
737 *falciparum*. *Parasite Immunol*. 2010 July 01;32(7):512-27.
- 738 50. Staalsoe T, Giha HA, Dodoo D, Theander TG, Hviid L. Detection of antibodies to variant  
739 antigens on *Plasmodium falciparum*-infected erythrocytes by flow cytometry. *Cytometry*. 1999  
740 April 01;35(4):329-36.

741 51. Ch'ng JH, Moll K, Quintana Mdel P, Chan SC, Masters E, Moles E, et al. Rosette-Disrupting  
742 Effect of an Anti-Plasmodial Compound for the Potential Treatment of Plasmodium falciparum  
743 Malaria Complications. *Sci Rep*. 2016 July 11;6:29317.

744 52. Viebig NK, Levin E, Dechavanne S, Rogerson SJ, Gysin J, Smith JD, et al. Disruption of  
745 var2csa gene impairs placental malaria associated adhesion phenotype. *PLoS One*. 2007  
746 September 19;2(9):e910.

747 53. Ghumra A, Khunrae P, Ataide R, Raza A, Rogerson SJ, Higgins MK, et al. Immunisation  
748 with recombinant PfEMP1 domains elicits functional rosette-inhibiting and phagocytosis-  
749 inducing antibodies to Plasmodium falciparum. *PLoS One*. 2011 January 31;6(1):e16414.

750

751

752 **Supplemental Information**

753 Extended Data Tables 1-3.

754 Extended Data Figs. 1-9.

755 Extended Data File 1.

756

757 **Acknowledgements**

758 We are grateful for the assistance provided by both the Microscopy and Histology Core Facility,  
759 and the Iain Fraser Cytometry Centre, at the University of Aberdeen. We thank Ann Wheeler and  
760 Matt Pearson from Edinburgh Super-Resolution Imaging Consortium for technical support with  
761 3D SIM microscopy. We also thank Janet A. Willment and Bernard Kerscher, supervised by  
762 G.D.B., for providing the Fc fusion proteins, Jeanette A. Wagener, supervised by Neil A.R.G.  
763 Gow, for providing high purity chitin, Jan Westland for obtaining blood samples and Paul  
764 Crocker for useful discussions.

765 Principal funding for this project was provided by Wellcome Trust grant 094847 (R.N.B, L.P.E,  
766 M.A.V). In addition, support was provided by Biotechnology and Biological Sciences Research  
767 Council grants BBF0083091 (A.D. and S.M.H.) and BBK0161641 (A.D. and S.M.H.),  
768 Wellcome Trust grant 082098 (A.D.), Wellcome Trust grants 97377, 102705 (G.D.B) and  
769 funding for the MRC Centre for Medical Mycology at the University of Aberdeen  
770 MR/N006364/1 (G.D.B).

771

772 **Author contributions**

773 H.C. carried out experiments, analysed data and wrote the paper. S.H., A.M., B.P., J.S., H.W.,  
774 M.A.F., E.B., S.L., G.K., B.M., M-L.W., A. Davie, D.T., M.M., L.H., C.L., W.P. carried out

775 experiments. J.B., supervised by D.C.R., and B.R. obtained blood samples. A.A. obtained and  
776 analysed glycomic and proteomic data, supervised by S.M.H. and A. Dell. L.E., G.D.B. and  
777 H.M.W. helped supervise the project. J.A.R. carried out experiments, analysed data and wrote  
778 the paper. R.N.B. and M.A.V. conceived and supervised the project, and wrote the paper.

779

#### 780 **Author information**

781 The authors declare the existence of a financial competing interest. The University of Aberdeen  
782 has applied for patents covering diagnostic and therapeutic applications arising from the work  
783 described in this paper. Correspondence and requests for materials should be addressed to  
784 M.A.V. ([m.a.vickers@abdn.ac.uk](mailto:m.a.vickers@abdn.ac.uk)) or A.R. ([Alex.Rowe@ed.ac.uk](mailto:Alex.Rowe@ed.ac.uk)).

785

#### 786 **Data Availability**

787 Some source data are provided in the online version of the paper. The other datasets generated  
788 during and/or analysed during the current study are available from the corresponding authors on  
789 reasonable request.







791 **Figure 1: HbSS RBCs are characterized by microdomain expression of surface mannoses.**

792 a) Whole blood flow cytometry analysis of HbAA and HbSS RBCs using fluorescently  
793 labelled plant lectins, detailed in Methods. Vertical axes show normalized geometric  
794 mean fluorescence (gMFI). Symbols of terminal carbohydrate detected by plant lectins  
795 are indicated. Data shown as median +/- IQR, n=7 per group for significant differences, 2  
796 tailed Mann-Whitney p values shown, distinct samples measured once each, 3 separate  
797 experiments. Annotation uses conventional symbols for carbohydrates in accordance with  
798 <http://www.functionalglycomics.org> guidelines: purple diamond, sialic acids; yellow  
799 circle, galactose; blue square, N-acetyl glucosamine; green circle, mannose; red triangle,  
800 fucose.

801 b) GNA lectin staining (red) of HbSS and HbAA RBCs, immunofluorescence, merged with  
802 bright field.

803 c) MALDI-ToF mass spectra (m/z versus relative intensity) for glycomic analysis of N-  
804 glycans from membrane ghosts from individual HbSS and HbAA donors. Red boxes  
805 indicate high mannose structures. Annotation uses conventional symbols for  
806 carbohydrates in accordance with <http://www.functionalglycomics.org> guidelines: purple  
807 diamond, sialic acids; yellow circle, galactose; blue square, N-acetyl glucosamine; green  
808 circle, mannose; red triangle, fucose. Only major structures are annotated for clarity. Full  
809 spectra of both HbSS and HbAA donors are shown in Extended Data Fig. 9.

810

811

**Figure 2**

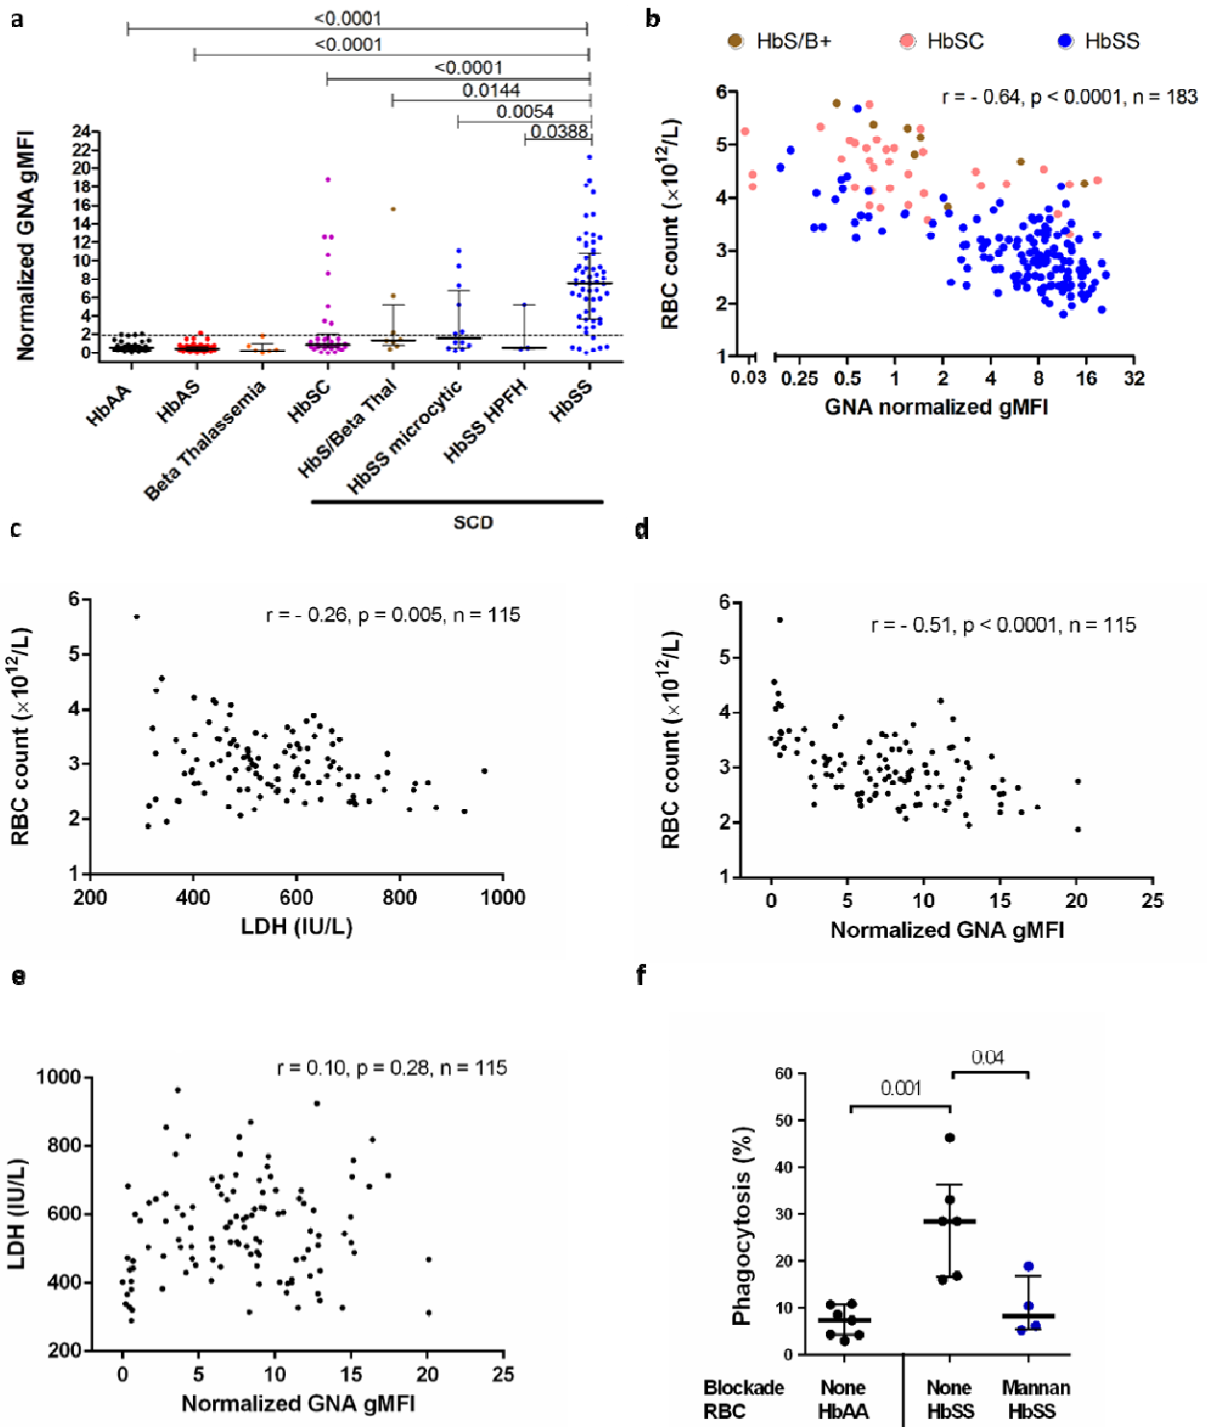

812

813

814 **Figure 2: Mannose expression correlate to clinical anaemia in SCD**

- 815 a) Normalized gMFI of GNA lectin staining of RBCs from peripheral blood samples,  
816 comparing RBC from patients with sub-types of SCD (milder phenotypes: HbSC (n=34),  
817 HbS/beta-thal (n=8), HbSS microcytic (n=12) and HbSS HPFH (n=3) indicate compound  
818 heterozygosity for HbC,  $\beta$ -thalassaemia,  $\alpha$ -thalassaemia and hereditary persistence of  
819 fetal haemoglobin respectively) versus healthy donors (n=45), sickle cell trait (n=57) and  
820  $\beta$ -thalassaemia (n=6). Dotted line indicates 90<sup>th</sup> centile of GNA lectin binding within  
821 healthy samples. Data shown as median +/- IQR, 2 tailed Mann-Whitney p values shown,  
822 distinct samples measured once each, numerous experiments.
- 823 b) Plot of RBC count against normalized GNA gMFI for SCD: HbS/B+ and HbSC indicates  
824 compound heterozygosity for HbS with  $\beta$ -thalassaemia and HbC respectively;  
825 Spearman's rank correlation.
- 826 Plots of:
- 827 c) RBC count versus serum lactate dehydrogenase (LDH),  
828 d) RBC count vs GNA binding,  
829 e) LDH vs GNA lectin binding; HbSS RBCs for which corresponding serum LDH values  
830 were available; Spearman's rank correlation,  
831 f) Percentage phagocytosis of HbAA and HbSS RBCs by human monocyte derived  
832 macrophages analysed by microscopy. Mannan inhibition as shown. Each data point  
833 represents a different RBC donor. Mann-Whitney; pooled from two experiments.

834

**Figure 3**

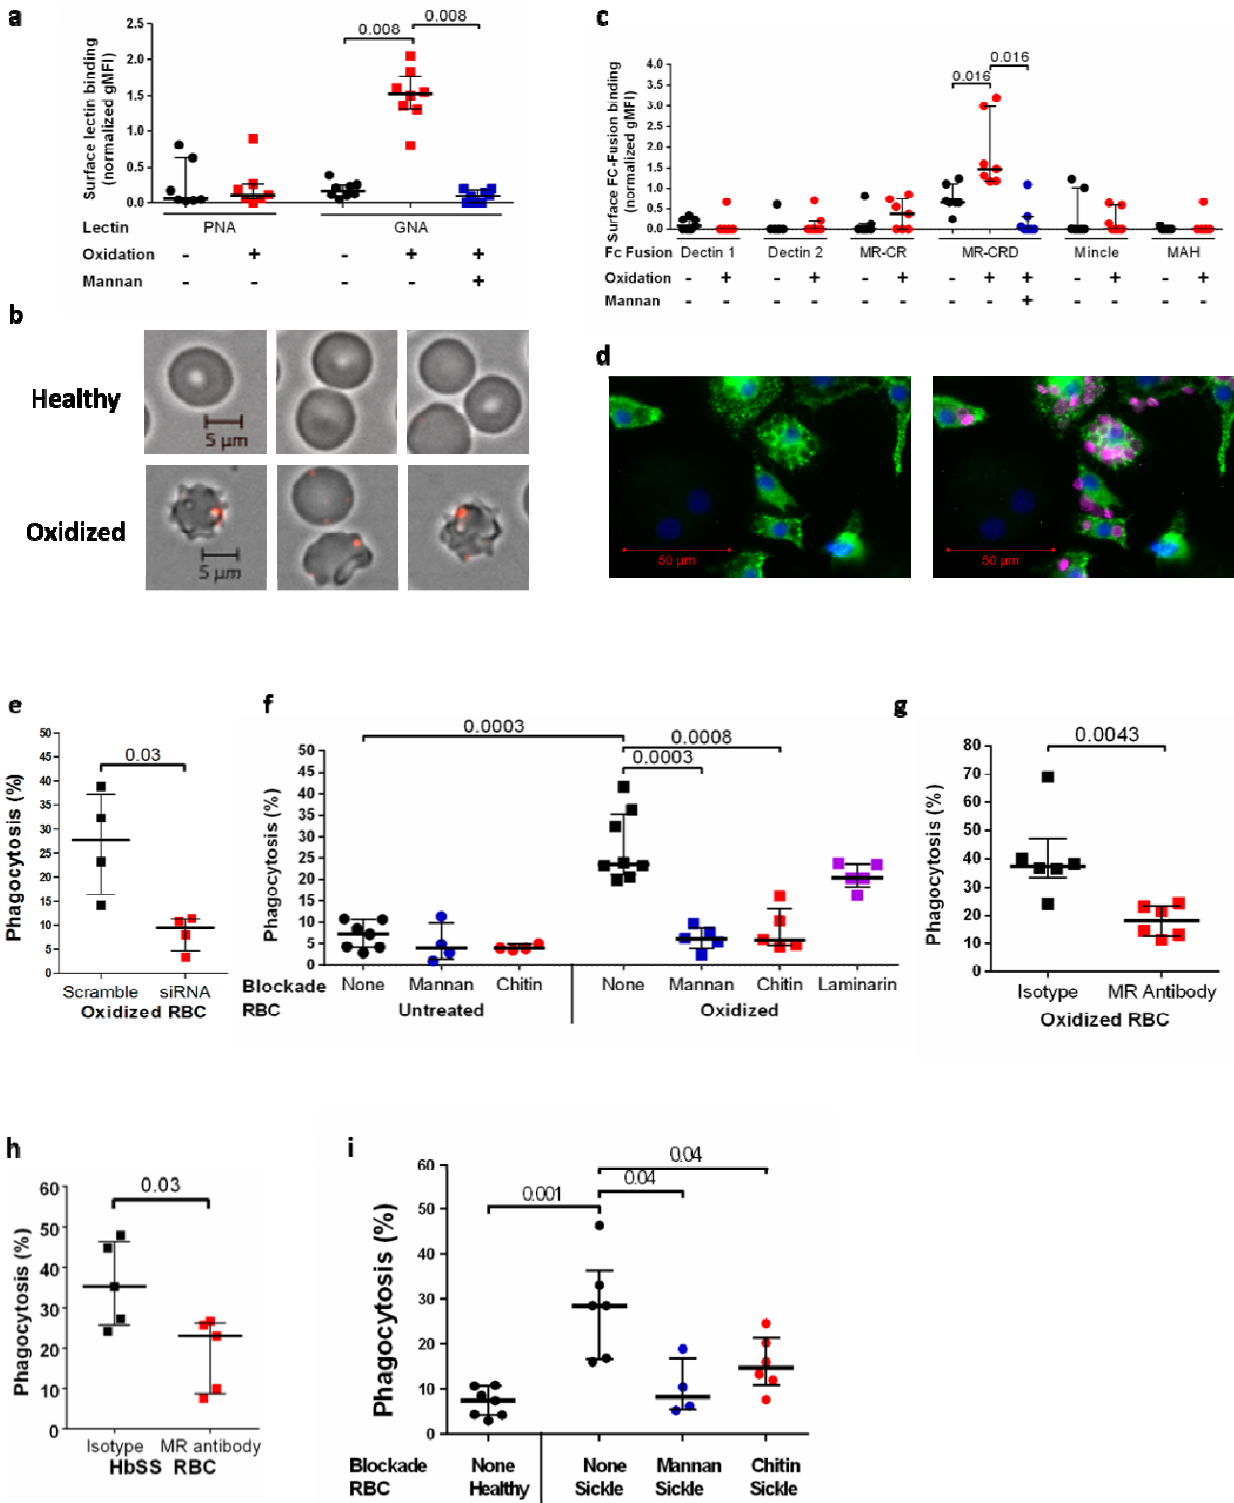

835

836

**Figure 3: Display of membrane skeleton associated mannose patches is induced by**

837 **oxidative stress and recognized by the mannose receptor on macrophages.**

- 838 a) PNA and GNA lectin binding to HbAA RBCs with or without oxidation. Mannan  
839 blockade for GNA lectin binding shown in blue. Wilcoxon, paired data, pooled from two  
840 independent experiments.
- 841 b) Immunofluorescence microscopy of GNA lectin/streptavidin (red) staining of healthy  
842 HbAA RBCs (above) and after oxidative insult (below).
- 843 c) Normalized gMFI for binding analysed by flow cytometry of murine Fc fusions with C-  
844 type lectins or sub-domains applied to oxidized versus undamaged RBCs. Mannan  
845 blockade of MR-CRD binding is shown in blue. MAH, macrophage antigen H. CR,  
846 cysteine rich. CRD, carbohydrate recognition domain. Wilcoxon, paired data, pooled  
847 from two independent experiments.
- 848 d) Immunofluorescence microscopy image of human monocyte derived macrophages  
849 (HMDM) stained with DAPI (blue) and for mannose receptor (green) after incubation  
850 with oxidized HbAA RBCs, shown in magenta.
- 851 e) Percentage phagocytosis of oxidized RBCs by HMDM treated with human MR specific  
852 or scrambled siRNA. Mann-Whitney, 2 experiments.
- 853 f) Percentage phagocytosis of healthy or oxidized HbAA RBCs by HMDM with or without  
854 pre-blocking by mannan, chitin or laminarin
- 855 g) As (f) but oxidized RBCs are blocked by MR-CRD blocking antibody 15.2 as indicated.  
856 Mann-Whitney.
- 857 h) Percentage phagocytosis of HbSS RBCs with or without pre-blocking by MR-CRD  
858 blocking antibody 15.2. Mann-Whitney, 3 experiments.

- 859           i) HbAA unblocked and HbSS unblocked or mannan and chitin blockade phagocytosis  
860           experiments as shown.

**Figure 4**

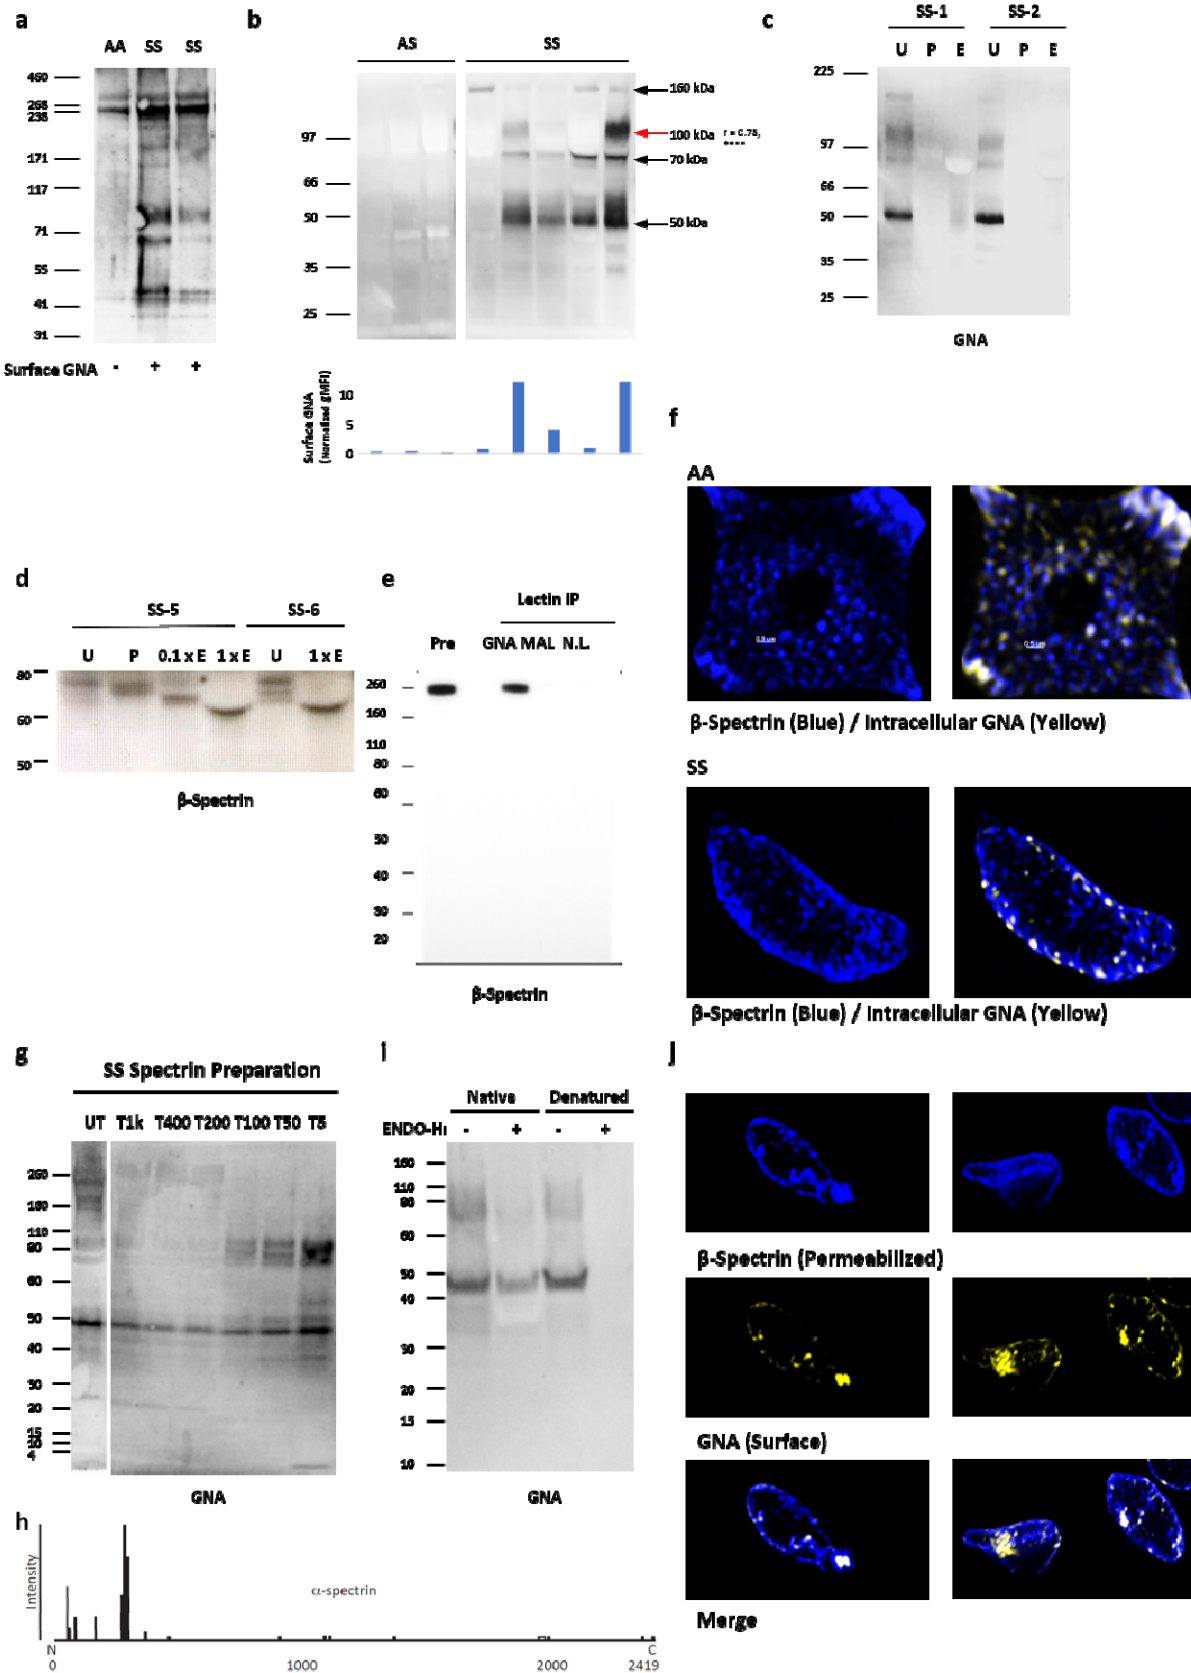

862 **Figure 4: High mannose decoration of spectrin containing fragments in sickle cell disease**

- 863 a) GNA lectin western blot from healthy (HbAA) and sickle (HbSS) ghosts.
- 864 b) Above are shown further GNA lectin western blots from HbAA and HBSS ghosts.
- 865 The histogram below the blot shows the flow cytometrically measured surface GNA
- 866 lectin staining values of the RBCs used to make the ghosts, with each bar
- 867 corresponding to the cells used to make the western lane above. The r value to the
- 868 right of the 100kDa size label is Spearman's rank correlation coefficient between
- 869 GNA lectin staining values and band intensities, both classified ordinally as high,
- 870 medium or low (n=27 measurements from 22 individuals). None of the other bands
- 871 yielded significant correlation coefficients.
- 872 c) GNA lectin blot from HbSS ghosts: untreated (U), treated by PNGase (P) or Endo-H
- 873 (E).
- 874 d) High exposure  $\beta$ -spectrin blot showing PNGase and partial/full (0.1X/1X) Endo-H
- 875 digestion of two HbSS ghosts.
- 876 e) Lectin precipitation of healthy ghosts with GNA or MAL-II lectins. No lectin control
- 877 is also shown. Immunoblot with  $\beta$ -spectrin specific antibody.
- 878 f) Super resolution microscopy image of spectrin membrane skeleton (blue) from
- 879 healthy (AA) and sickle cells (SS). Yellow clusters of GNA staining are overlaid. 3D
- 880 image is sliced to reveal single sheet of membrane skeleton network.
- 881 g) GNA lectin blot of spectrin released from HbSS ghosts after digestion with trypsin
- 882 for one hour. Untreated (UT), Tx indicates the dilution factor of trypsin relative to
- 883 spectrin material.



- 884 h) Peptide coverage and intensity map of  $\alpha$ -spectrin from proteomic analysis of F40  
885 following chymotrypsin treatment.
- 886 i) GNA lectin blots showing Endo-H treatment of the 10kDa concentrate from (e) under  
887 native or denaturing conditions (urea/SDS/2-mercaptoethanol) for 24 hours.
- 888 j) 3D SIM super-resolution microscopy of surface GNA lectin binding and internal  $\beta$ -  
889 spectrin in HbSS. HbSS RBC are first stained with GNA lectin (yellow), then  
890 permeabilized, and stained with anti-spectrin antibody (blue).
- 891

Figure 5

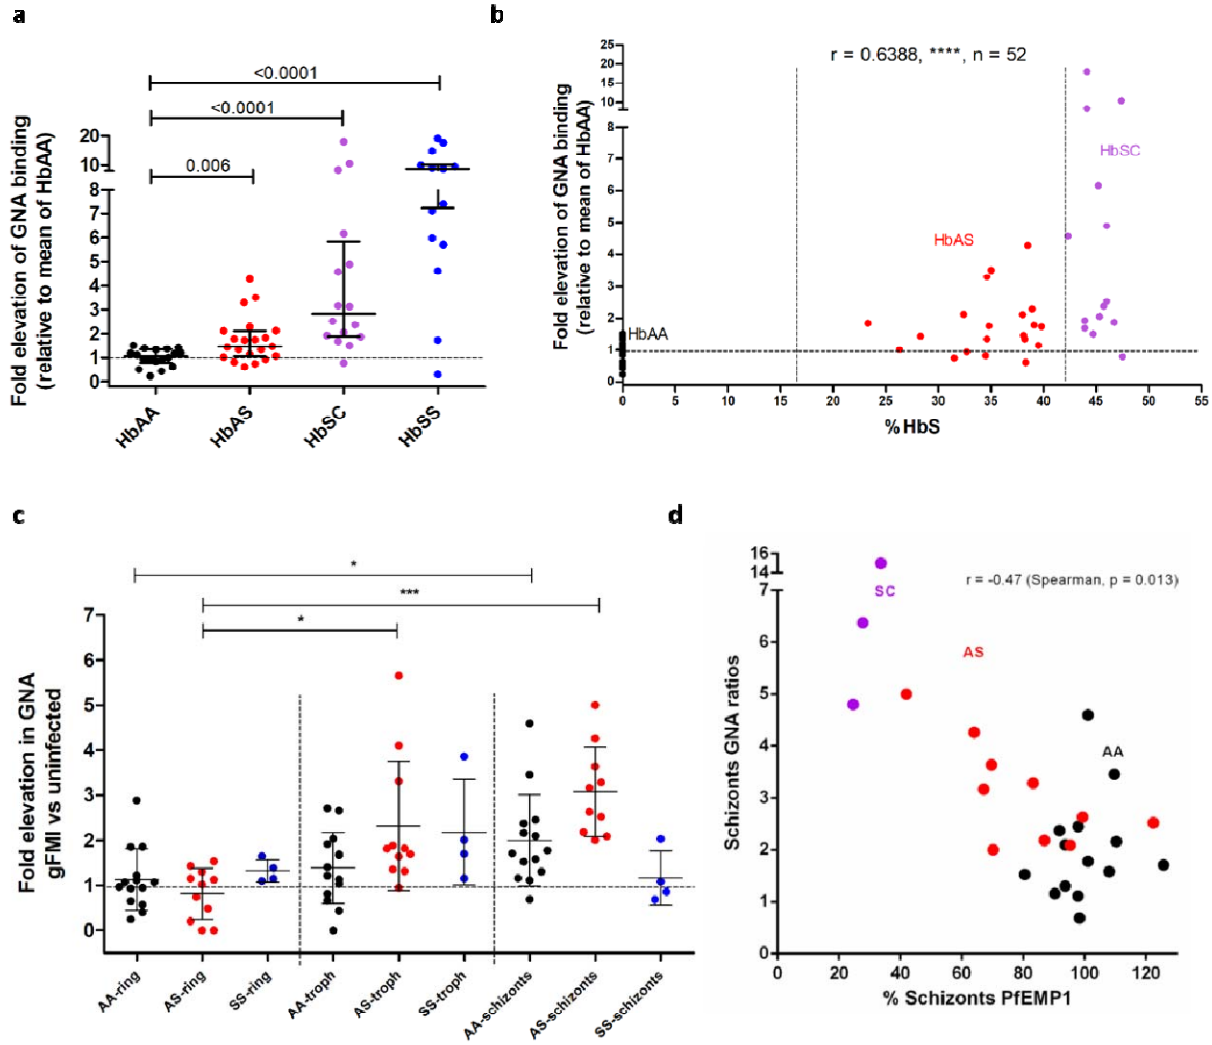

893 **Figure 5: High levels of mannose are displayed by sickle cell trait RBCs in response to both**  
894 **oxidative stress and infection with *P. falciparum*.**

895 a) GNA lectin binding to HbAA versus HbAS, HbSC, HbSS RBCs in response to oxidative  
896 stress, expressed as ratio to mean of oxidized HbAA samples. >5 experiments, Mann-  
897 Whitney.

898 b) HbS percentage is plotted against elevation of GNA lectin binding in response to  
899 oxidative stress as in (a). HbAA, HbAS and HbSC donor samples are shown as indicated.  
900 Spearman's rank statistics shown.

901 c) GNA binding to HbAA, HbAS and HbSS RBCs in response to infection with *P.*  
902 *falciparum*. Values for rings, trophozoites and schizonts are expressed as ratios relative to  
903 the uninfected gate. Linked ANOVA analysis for HbAA (\*,  $p < .05$ ), HbAS (\*\*\*,  $p < .001$ ),  
904 HbSS (n.s.); Tukey's multiple comparison within each genotype, 5 experiments.

905 d) Plot of relative GNA lectin binding for RBCs infected by schizonts against relative  
906 PfEMP1 expression. Haemoglobin phenotypes of donors as indicated, Spearman's rank.

907

908 **Extended Data Table 1: Exclusion of possible lectin binding artefacts for SCD RBCs.**

909

| Potential artefact                         | Exclusion                                                                                                                                                                                                                                                                                                                                                                                |
|--------------------------------------------|------------------------------------------------------------------------------------------------------------------------------------------------------------------------------------------------------------------------------------------------------------------------------------------------------------------------------------------------------------------------------------------|
| Non-specific binding of GNA lectin         | <ul style="list-style-type: none"><li>• Wide lectin panel shows specificity (Fig.1a)</li><li>• NPL lectin binding highly correlated with GNA lectin binding across all samples (Extended Data Fig. 1a)</li><li>• Mannan blockade (Extended Data Fig. 1b)</li><li>• No binding of GNA lectin to non-SCD haemolytic anaemia, HbAA and HbAS RBCs (Fig. 2a, Extended Data Fig. 2a)</li></ul> |
| Non-specific binding on sickle cells       | Little binding with Annexin V (Extended Data Fig. 2b), in contrast to eryptotic RBC control (Extended Data Fig. 2c)                                                                                                                                                                                                                                                                      |
| Sickle cells permeable to lectins          | Lack of binding of other lectins or antibodies against intracellular antigens, BRIC-132/163 (Extended Data Fig. 4d)                                                                                                                                                                                                                                                                      |
| O-GlcNAc detection instead of high mannose | No surface binding by antibody RL2, specific for O-GlcNAc (Extended Data Fig. 4e for oxidized RBCs and Extended Data Fig. 4f for HbSS RBCs)                                                                                                                                                                                                                                              |
| Reticulocytosis                            | Lack of expression on non-SCD RBCs with high reticulocyte counts (Extended Data Fig. 3d, e).                                                                                                                                                                                                                                                                                             |
| Intravascular haemolysis                   | LDH independence (Fig. 2c, d, e)                                                                                                                                                                                                                                                                                                                                                         |

910

911 **Extended Data Table 2.** Proteomic LC-MS analysis of 260kDa band cut from SDS-PAGE of  
912 ghosts from healthy (HbAA) RBCs. Proteins included are with minimum: 99.5% probability, 3  
913 peptides identified, and 5.0% sequence coverage. Common contaminants (e.g. keratins and  
914 trypsin) have been removed. Identified proteins (UniProt accession, entry codes and description)  
915 were sorted based on the number of sequence coverage (%Cov). MW, molecular weight in Da;  
916 PLGS score, ProteinLynx Global Server score.

917  
918

| Accession | Entry       | Description                                                                       | MW     | PLGS score | Prob. (%) | Peptides | %Cov |
|-----------|-------------|-----------------------------------------------------------------------------------|--------|------------|-----------|----------|------|
| P02549    | SPTA1_HUMAN | Spectrin alpha chain, erythrocytic 1 OS=Homo sapiens                              | 279840 | 9.9        | 100.0     | 125      | 53.5 |
| P11277    | SPTB1_HUMAN | Spectrin beta chain, erythrocytic OS=Homo sapiens                                 | 246313 | 9.9        | 100.0     | 46       | 26.6 |
| P02730    | B3AT_HUMAN  | Band 3 anion transport protein OS=Homo sapiens                                    | 101727 | 9.9        | 100.0     | 14       | 19.0 |
| P16157    | ANK1_HUMAN  | Ankyrin-1 OS=Homo sapiens                                                         | 206136 | 9.9        | 100.0     | 25       | 17.0 |
| P11166    | GTR1_HUMAN  | Solute carrier family 2, facilitated glucose transporter member 1 OS=Homo sapiens | 54048  | 9.9        | 100.0     | 3        | 6.3  |

919

920 **Extended Data Table 3.** Proteomic analysis of F40 trypsin resistant gel band identified  $\alpha$ -  
 921 spectrin peptides (accession P02549, entry SPTA1\_HUMAN), sorted on intensities. Peak MW,  
 922 molecular weight of the protonated (MH+) peptide found in Da; peptide MW, theoretical  
 923 molecular weight of the protonated (MH+) peptide in Da; delta, difference between peak MW  
 924 and peptide MW in ppm; score, PLGS score. In peptide sequence, cysteine (C) amino acids in  
 925 **bold** and underlined correspond to carboxymethylated cysteine amino acid.

926  
 927

| Peak MW (MH+) | Peptide MW (MH+) | Delta (ppm) | Score | Sequence |      | Sequence                                                                 | Intensity |
|---------------|------------------|-------------|-------|----------|------|--------------------------------------------------------------------------|-----------|
|               |                  |             |       | Start    | End  |                                                                          |           |
| 1550.795      | 1550.795         | 0.08        | 6.8   | 280      | 292  | IKEKEPVLTSEDY                                                            | 317025    |
| 1135.598      | 1135.599         | -1.18       | 6.6   | 293      | 303  | GKDLVASEGLF                                                              | 226142    |
| 643.359       | 643.356          | 4.36        | 6.3   | 54       | 58   | HLQVF                                                                    | 146116    |
| 1245.657      | 1245.659         | -1.14       | 6.1   | 270      | 279  | KRDVTEAIQW                                                               | 119871    |
| 1203.611      | 1203.612         | -0.93       | 5.6   | 59       | 68   | KRDADDLGKW                                                               | 34163     |
| 1164.551      | 1164.553         | -2.02       | 5.5   | 82       | 91   | EDPTNIQGKY                                                               | 63659     |
| 1263.555      | 1263.556         | -0.65       | 5.4   | 164      | 173  | VQEC <u>AD</u> ILEW                                                      | 66792     |
| 852.448       | 852.446          | 1.73        | 5.2   | 364      | 370  | EKLQATY                                                                  | 23647     |
| 966.491       | 966.489          | 2.03        | 5.1   | 2362     | 2370 | QALAEGKSY                                                                | 1717      |
| 5788.926      | 5788.981         | -9.48       | 4.8   | 1869     | 1920 | AVHETRVQNV <u>CA</u><br>QGEDILNKVLQEES<br>QNKEISSKIEALNE<br>KTPSLAKAIAAW | 3774      |
| 802.330       | 802.337          | -8.22       | 4.8   | 2413     | 2419 | TNSYFGN                                                                  | 5889      |
| 1603.711      | 1603.739         | -17.40      | 4.8   | 902      | 914  | QQYLADLHEAET<br>W                                                        | 6290      |
| 2193.952      | 2193.977         | -11.35      | 4.8   | 466      | 481  | DERHRQYEQ <u>CL</u> DF<br>HLF                                            | 1892      |
| 2065.934      | 2066.004         | -33.71      | 4.7   | 1944     | 1963 | IADKETSLKTNGN<br>GADLGDF                                                 | 6335      |
| 950.372       | 950.392          | -21.38      | 4.6   | 1090     | 1097 | EAGDMLEW                                                                 | 1078      |
| 3284.517      | 3284.539         | -6.43       | 4.5   | 1385     | 1410 | EKRKKILDQ <u>C</u> LEL<br>QMFQGN <u>CD</u> QVES<br>W                     | 2553      |
| 2727.342      | 2727.442         | -36.73      | 4.4   | 1124     | 1146 | QKDLNTNEPRLRDI<br>NKVADDLLF                                              | 1109      |

928  
 929

Extended Data Fig. 1

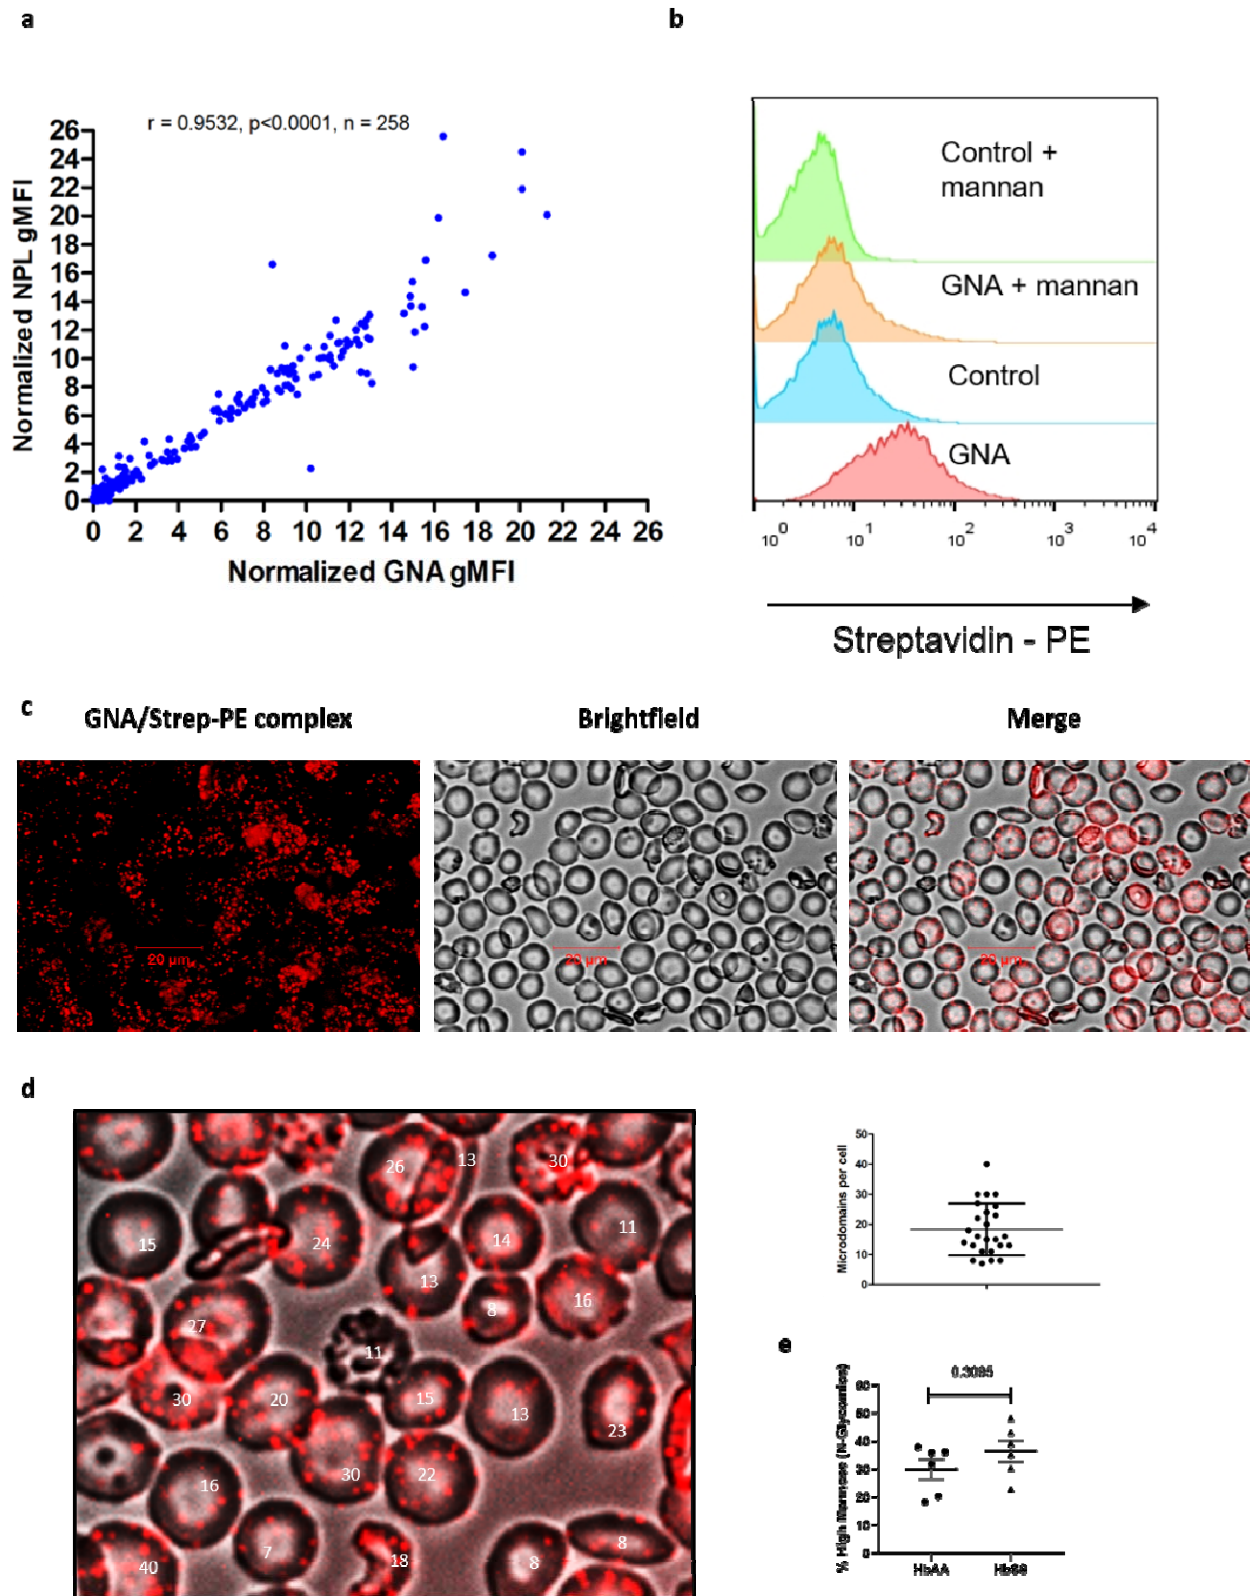

931 **Extended Data Figure 1: Specificity of binding of mannose binding lectins to RBCs.**

- 932 a) Correlation of NPL with GNA lectin surface binding; normalized gMFI, Spearman's rank  
933 correlation.
- 934 b) Flow cytometric histograms of GNA lectin and streptavidin control binding for HbSS  
935 RBCs with and without mannan blockade. Representative of 3 independent experiments  
936 from different donors.
- 937 c) GNA lectin/Streptavidin PE staining of HbSS RBCs is visualized by fluorescence  
938 microscopy (PE alone, Brightfield alone and merge).
- 939 d) HbSS RBCs from a section of image from c) are counted for the number of GNA lectin  
940 binding patches visualized by fluorescence microscopy (left) and plotted on the right.  
941 Mean 18.3, SD 8.6.
- 942 e) Percentage high mannose structures, with respect to total N-glycans. Untreated HbAA (n  
943 = 2) and HbSS (n = 5) ghosts are analysed by N-glycome mass spectrometry. Results are  
944 pooled from four independent experiments. High mannose and complex N-glycans total  
945 100%. Mann Whitney statistical test.



946

**Extended Data Fig. 2**

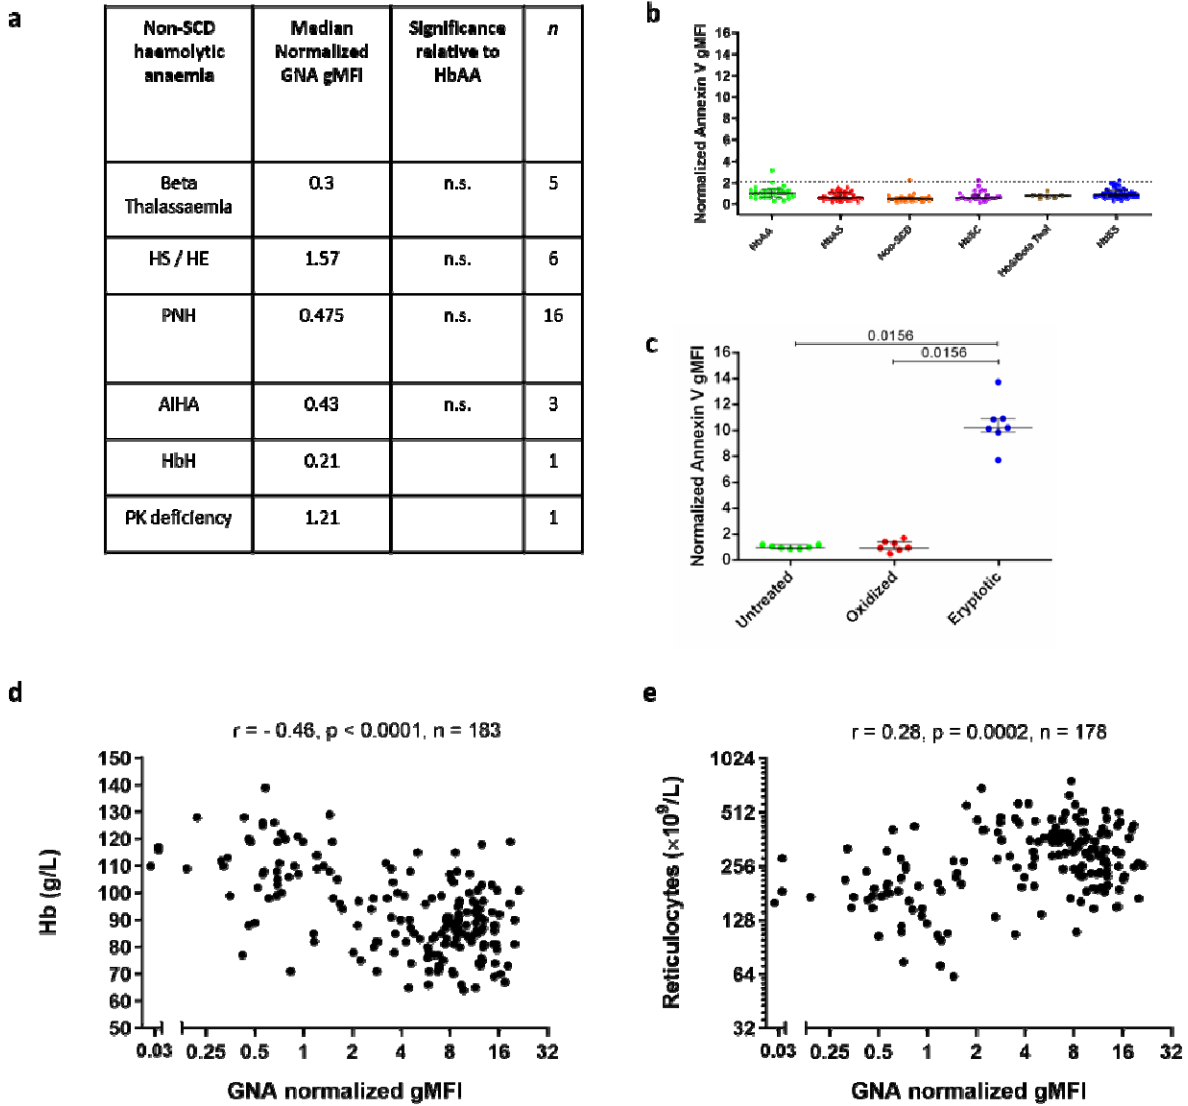

947

948 **Extended Data Figure 2: Binding of mannose binding lectins and annexin V to RBCs.**

- 949 a) Table of normalized gMFI values for GNA lectin binding to non-SCD haemolytic  
950 anaemias, Mann-Whitney tests relative to HbAA.
- 951 b) Normalized gMFI of annexin V binding to RBCs in whole blood samples. Dotted line  
952 shows 90<sup>th</sup> centile of annexin V staining within HbAA. Non-SCD include haemolytic  
953 anaemias listed in Extended Data Fig. 2a. HbAA (n=29), HbAS (n=42), Non-SCD  
954 (n=33), HbSC (n=30), HbS/Beta Thal (n=7), HbSS (n=52). No significant differences by  
955 Mann-Whitney.
- 956 c) Normalized gMFI of annexin V binding to oxidized (copper sulphate/ascorbic acid),  
957 eryptotic (calcium ionophore) or untreated purified HbAA RBCs; Wilcoxon.
- 958 d) Plots of haemoglobin concentrations,
- 959 e) and reticulocyte counts against normalized GNA lectin gMFI for SCD including HbS/B+,  
960 HbSC (compound heterozygosity for HbS with  $\beta$ -thalassaemia and HbC respectively)  
961 and HbSS patients. Spearman's rank correlation shown.

Extended Data Fig. 3

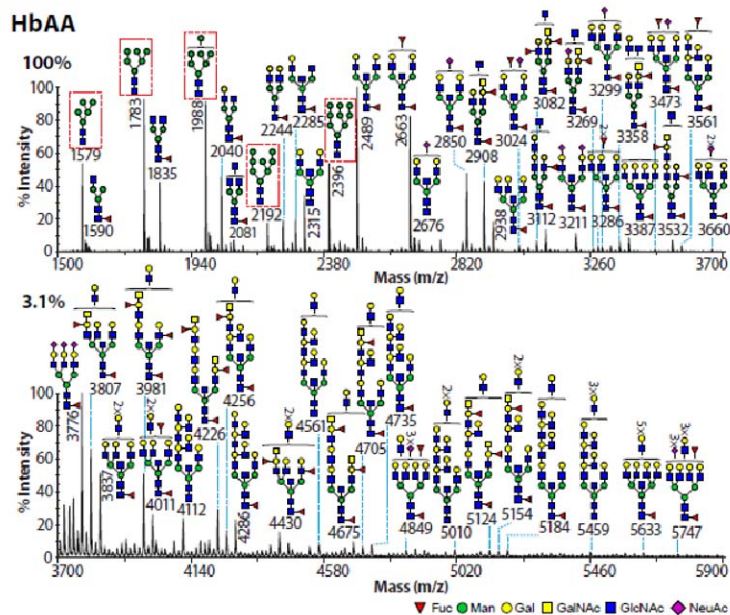

For calculation, upper panel of N-glycans has been taken into account.

High mannose N-glycans: 35.9%

Complex N-glycans: 64.1%

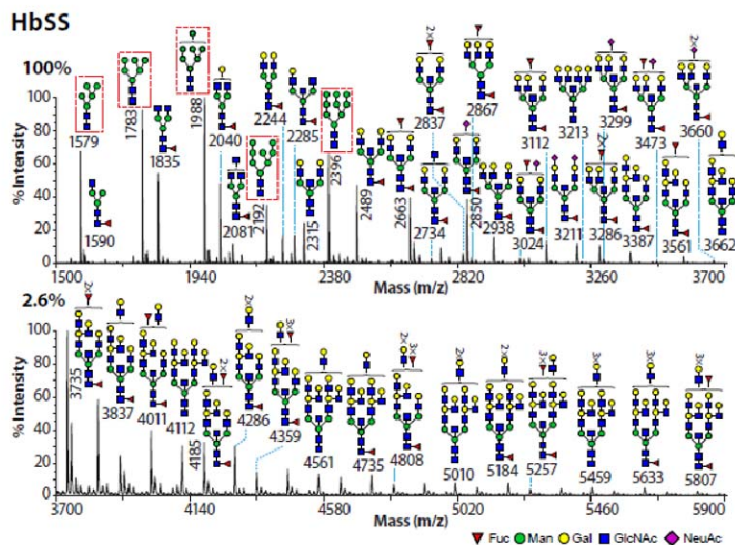

For calculation, upper panel of N-glycans has been taken into account.

High mannose N-glycans: 48.3%

Complex N-glycans: 51.7%

963 **Extended Data Figure 3. Full N-glycome spectra from HbAA and HbSS ghosts.**

964 Spectra from individual HbAA (upper panel) and HbSS (lower panel) ghosts are shown. Zoom

965 factors are indicated by the percentages on top of the intensity axis. For calculations of

966 percentages high mannose and complex N-glycans, the upper panel of each N-glycan profile was

967 used.

968

969

**Extended Data Fig. 4**

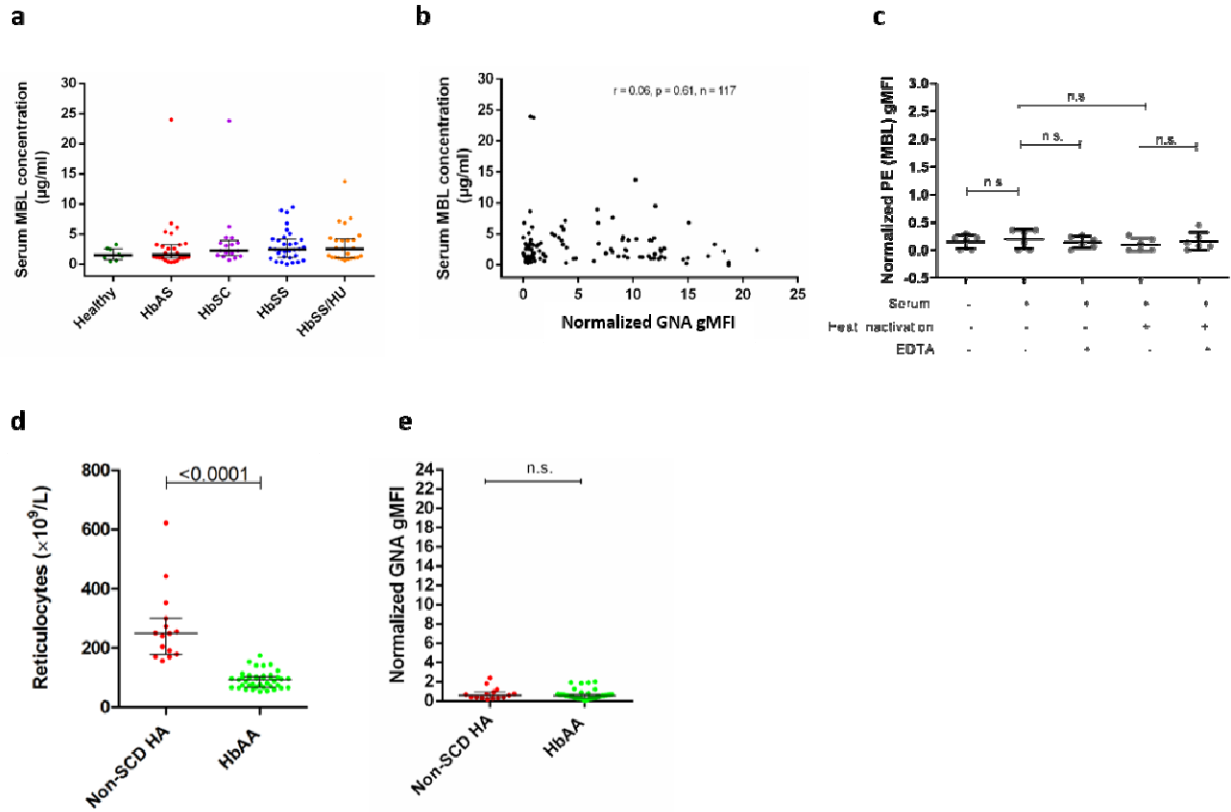

970

971 **Extended Data Figure 4: Mannose binding lectin correlations and stratification of mannose**  
972 **relationship to anaemia.**

973 Concentrations of serum mannose binding lectin (MBL): (a) split by clinical phenotype (HbAA  
974 (n=8); HbAS (n=27); HbSC (n=17); HbSS (not receive hydroxycarbamide treatment, n=32);  
975 HbSS/HU (receiving hydroxycarbamide treatment, n=25), (b) correlation with surface GNA  
976 lectin binding and (c) lack of direct binding to HbSS RBCs (n=6). Comparison of reticulocyte  
977 counts (d) or normalized GNA lectin binding gMFI (e) between HbAA and non-SCD haemolytic  
978 anaemias (Non-SCD HA). For d), HbAA (n=15), non-SCD (n=37). For e), HbAA (n=15), non-  
979 SCD (n=41).



981 **Extended Data Figure 5: Oxidation exposes mannose on the surface of RBCs**

- 982 a) Confocal microscopy of HbAA RBCs permeabilized before staining with biotinylated  
983 GNA lectin, streptavidin (yellow) and anti-spectrin (blue).
- 984 b) Rate of radical formation calculated from six-hour time course measurement for healthy  
985 RBCs with or without oxidation by CuSO<sub>4</sub>/ascorbic acid during time course.
- 986 c) Flow cytometric analysis of healthy, oxidized and HbSS RBCs using BRIC 132 (anti-  
987 cytoplasmic band 3) or BRIC 163 (anti-cytoplasmic glycophorin A). Left hand panels: i)  
988 histograms for permeabilized versus non-permeabilized binding of HbAA RBCs to BRIC  
989 antibodies. ii) BRIC antibody binding to surfaces of oxidized and undamaged HbAA  
990 RBCs. Differences not significant by Mann-Whitney. Right hand panel (iii): BRIC  
991 antibody and GNA lectin binding to RBCs from two HbSS donors, without  
992 permeabilization.
- 993 d) Flow cytometric analysis of healthy, oxidized and HbSS RBC using O-GlcNAc specific  
994 antibody, RL2. i) Normalized GNA lectin and RL2 binding for undamaged and oxidized  
995 RBCs, without permeabilization. ii) Histograms for RL2 binding to permeabilized  
996 nucleated cells shown. Right hand panel (iii): RL2 antibody and GNA lectin binding to  
997 RBCs from two HbSS donors, without permeabilization.



998

Extended Data Fig. 6

Two-toned fluorescence phagocytosis (TTFP) assay

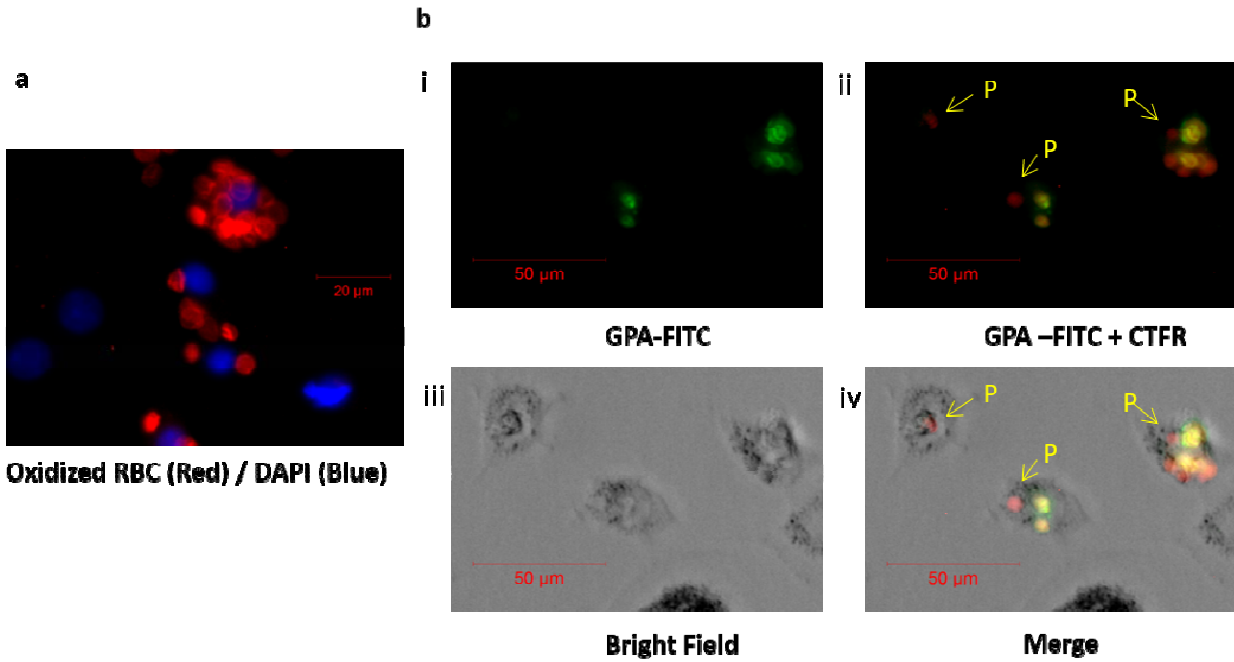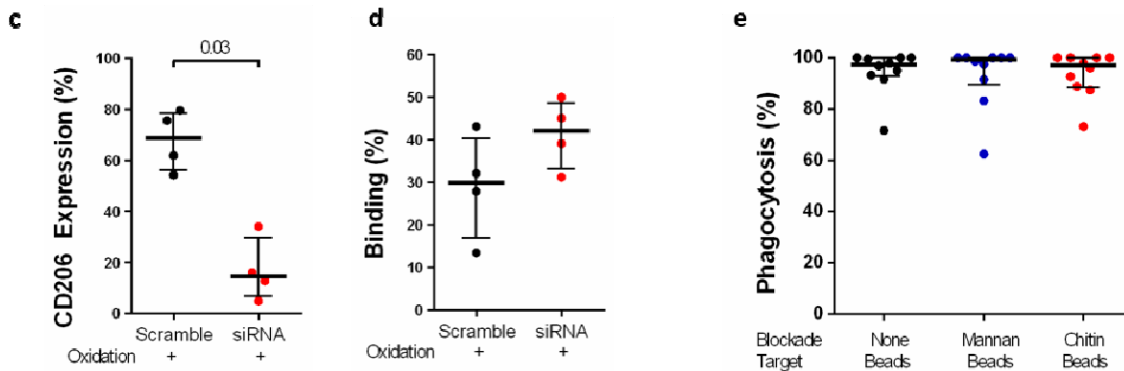

999

1000

1001 **Extended Data Figure 6: Two-toned fluorescence phagocytosis (TTFP) assay**

1002 a) Oxidized RBCs stained with Cell Trace Far Red (CTFR, red) are incubated with HMDM  
1003 for 3 hours, washed with PBS, permeabilized and stained for nucleus (DAPI, blue).  
1004 Immunofluorescence. Scale bar shown.

1005 b) Oxidized RBCs stained with Cell Trace Far Red (CTFR, red) are incubated with HMDM  
1006 for 3 hours, washed with PBS, and counter-stained prior to immunofluorescence  
1007 microscopy with anti-GPA-FITC antibody (green) to identify RBCs that are not  
1008 sequestered inside macrophages: GPA-FITC only (i), GPA-FITC and CTFR (ii), bright  
1009 field only (iii) and merged (iv). CTFR (red) single positive cells are counted as having  
1010 been phagocytosed (letter E). Double positive (CTFR and GPA) cells are not counted as  
1011 having been phagocytosed, but bound to the macrophage cell surface. Scale bar 50  $\mu$ m  
1012 scale as shown.

1013 c) Mannose receptor (CD206) expression assessed by microscopy for human monocyte  
1014 derived macrophages treated with siRNA or scramble control. Mann-Whitney.

1015 d) Percentage surface binding of HbSS RBCs assessed by microscopy for human monocyte  
1016 derived macrophages treated with siRNA or scramble control.

1017 e) Quantified phagocytosis beads by HMDM with and without glycan polymer blockade,  
1018 applied in the same way and the same concentration as for RBC phagocytosis  
1019 experiments.

1020

1021

**Extended Data Fig. 7**

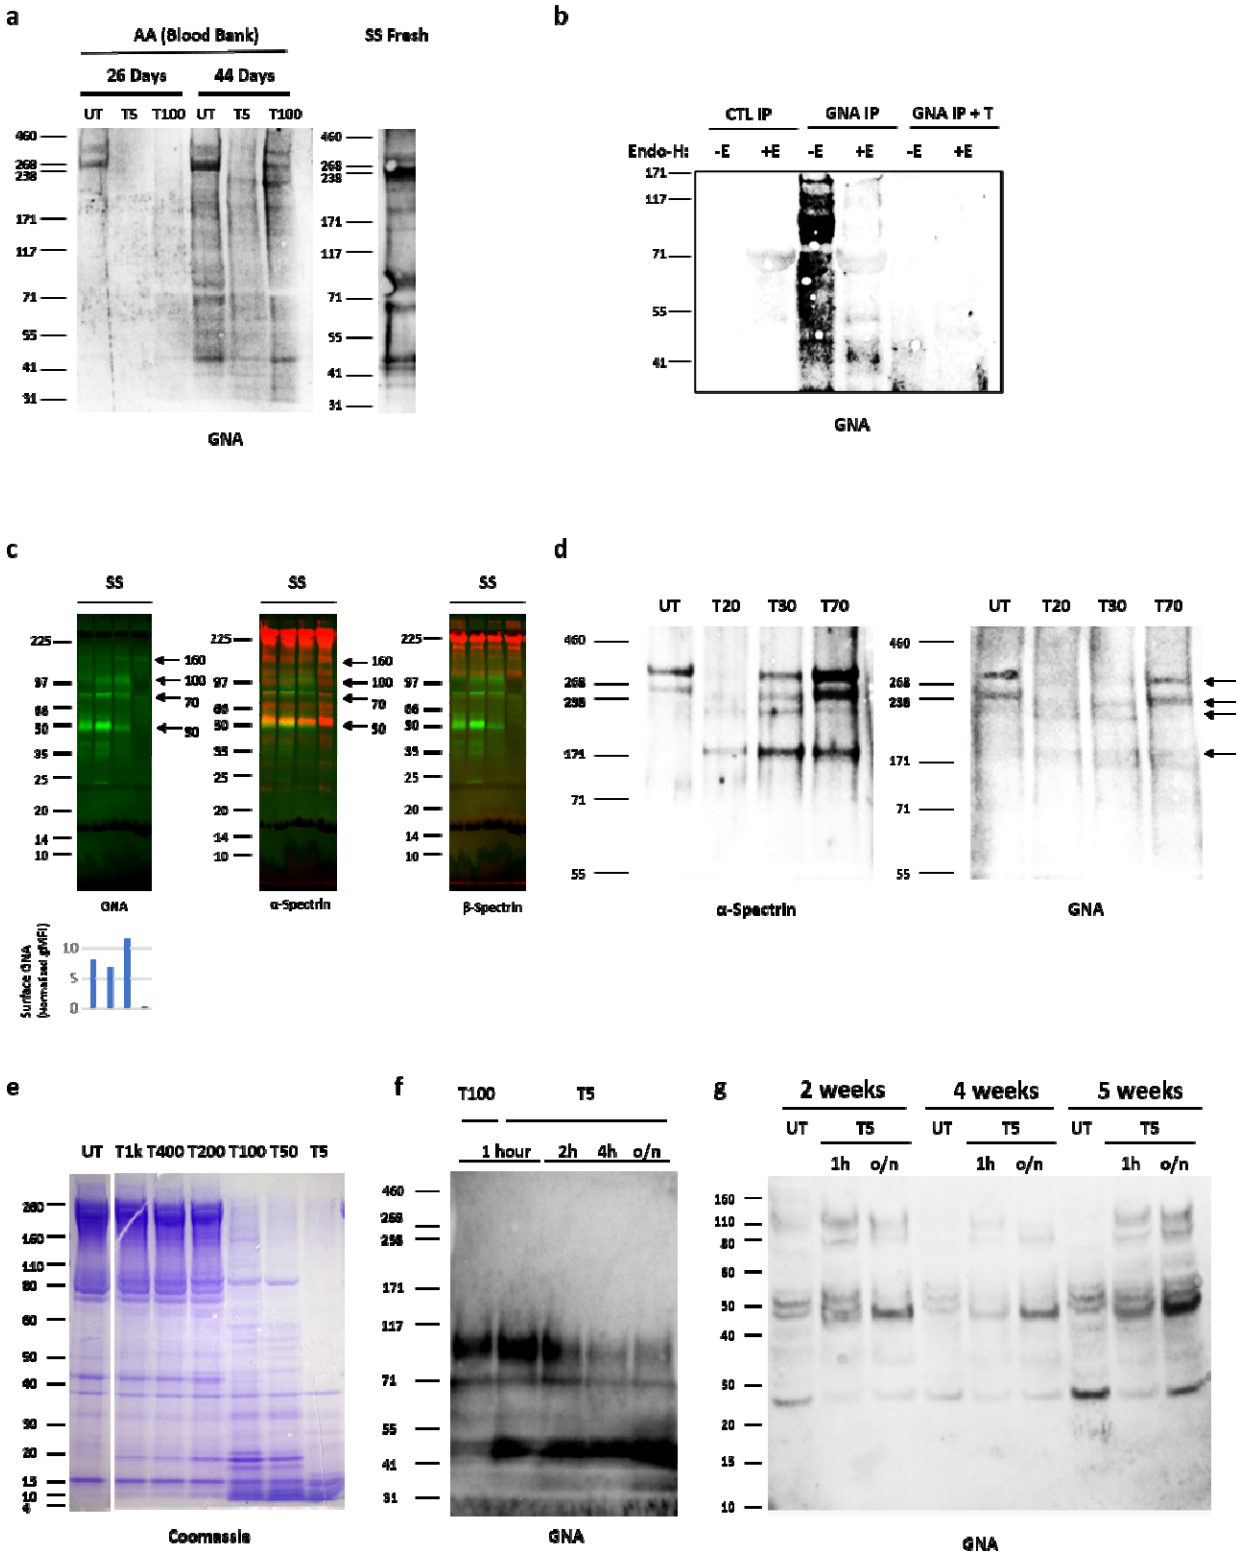

1022

1023 **Extended Data Figure 7: High mannose positive fragments derived from aging and**  
1024 **proteolysis**

- 1025 a) GNA lectin western from HbAA ghosts isolated from erythrocytes stored from 26 to 44  
1026 days. T5 and T100 indicate trypsin digestion of ghosts, where the number indicates the  
1027 dilution factor of trypsin. Comparison HbSS GNA lectin blot is shown, demonstrating  
1028 correspondence in the positions of the ~160kDa, ~100kDa, ~70kDa and ~50kDa  
1029 fragments.
- 1030 b) Stored RBC (>40 days) ghosts are Triton treated and subjected to GNA lectin  
1031 precipitation or control (no lectin) precipitation. Endo-H (+E) or control digestion (-E) is  
1032 applied to the eluates. Overnight trypsin treatment is also applied to a subset of GNA IP  
1033 elution (GNA IP + T), prior to Endo-H or control digestions.
- 1034 c) Dual colour western blot from HbSS ghosts using GNA lectin (green) with either  $\alpha$ -  
1035 spectrin or  $\beta$ -spectrin antibodies (both red). Below are corresponding surface FACS GNA  
1036 lectin staining (normalized gMFI). N.B. The 8-18% gradient gel used here does not yield  
1037 bright 260kDa GNA lectin binding bands.
- 1038 d) Partial trypsin digestion of HbAA ghosts (T70 indicates 1:70 ratio of trypsin to sample,  
1039 etc) then blotted with polyclonal  $\alpha$ -spectrin antibody or GNA lectin.
- 1040 e) Coomassie stain of spectrin released from HbSS ghosts after digestion with trypsin for  
1041 one hour. Untreated (UT), Tx indicates the dilution factor of trypsin relative to spectrin  
1042 material.
- 1043 f) GNA lectin blot of HbSS ghost after prolonged trypsin treatment from 1 hour to  
1044 overnight (20hours).

- 1045 g) GNA lectin blot of ghosts made from HbSS erythrocytes aged from 2 to 5 weeks.
- 1046 Untreated (UT), one hour (1h) and overnight (o/n) high concentration trypsin digestions
- 1047 (T5).

Extended Data Fig. 8

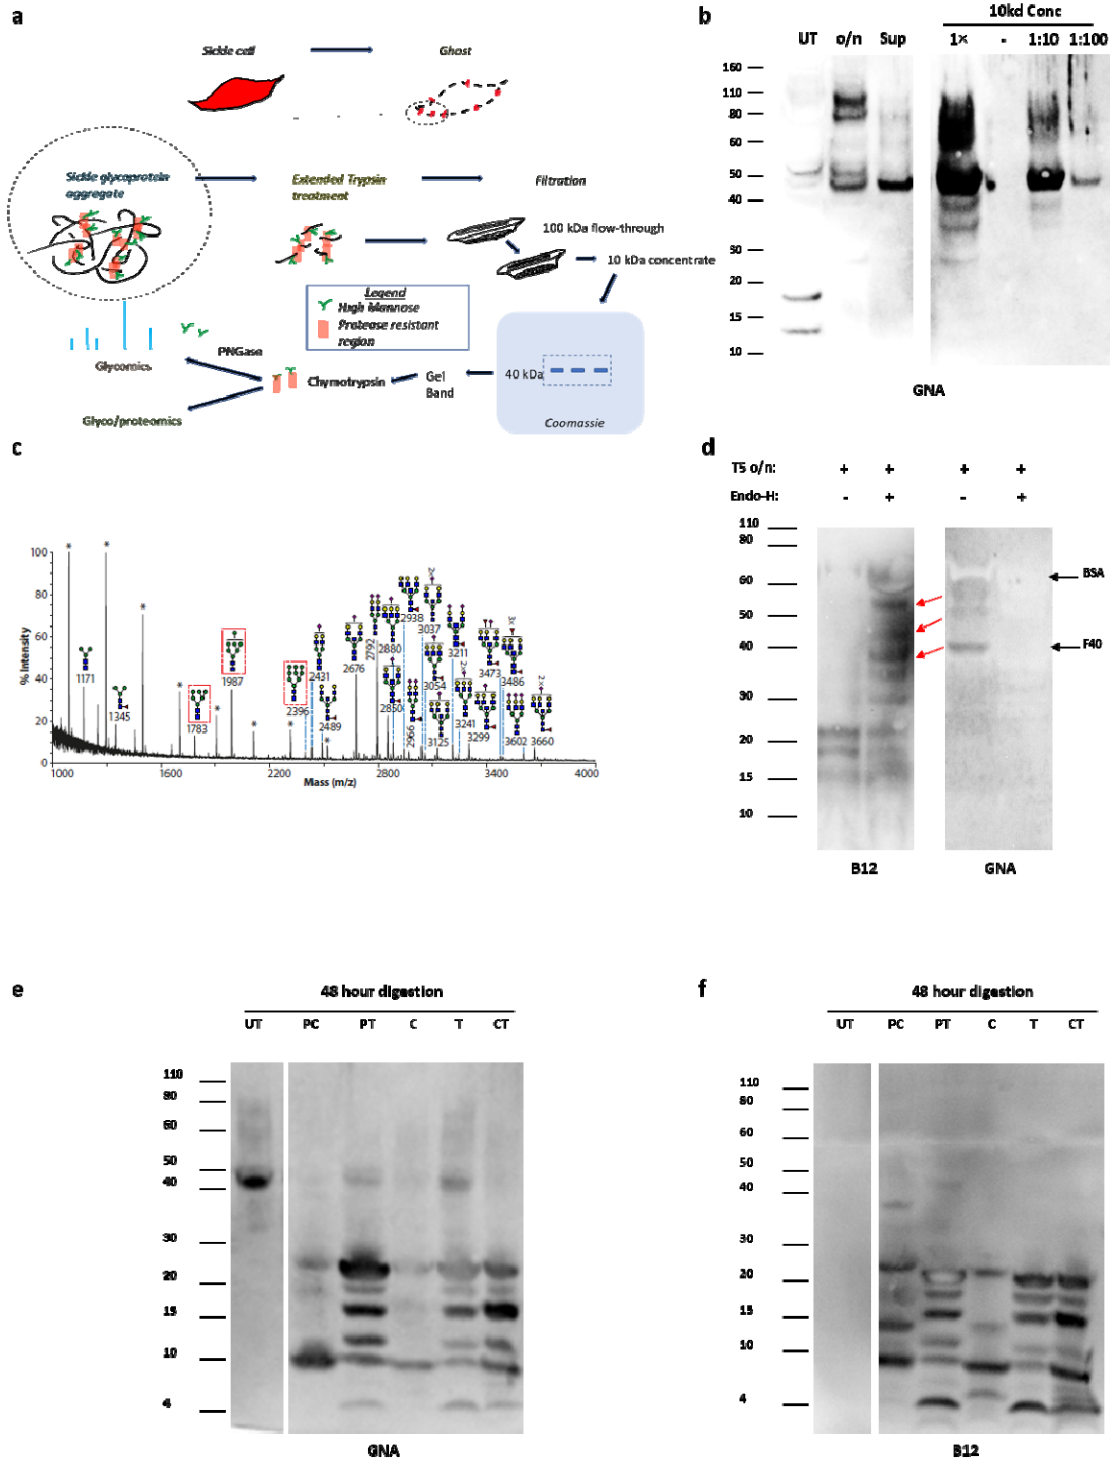

1048

1049 Extended Data Figure 8: Purification and analysis of protease resistant F40 from sickle

1050 cells.

- 1051 a) Cartoon outlining purification process for peptide F40. Sickle cells (top right) are used to  
1052 make RBC ghosts, which are then subjected to prolonged incubation with trypsin before  
1053 removing the ghosts by centrifugation. The supernatant is then passed through a 100 kDa  
1054 filter and concentrated on a 10 kDa filter before running on a polyacrylamide gel. The  
1055 ~40 kDa band is cut out and digested with chymotrypsin (then PNGase) before analysis  
1056 by mass spectroscopy for glycopeptides (and glycans).
- 1057 b) GNA lectin blot of enrichment process of F40 from aged HbSS erythrocyte ghosts.  
1058 Untreated (UT); overnight T5 (o/n); supernatant from heat inactivated o/n sample (Sup).  
1059 Final product from sequential concentration with 100kDa and 10kDa concentrators is  
1060 shown as 1×, 1:10 and 1:100 dilution series. See explanatory notes below.
- 1061 c) Glycomic analysis following PNGase release of N-linked glycans from F40. Red boxes  
1062 indicate high mannoses. Putative structures based on composition, tandem MS and  
1063 biosynthetic pathways. All ions are  $[M+Na]^+$ . Peaks annotated with an asterisk (\*) do not  
1064 correspond to glycan structures. Major structures are annotated for clarity.
- 1065 d) HbSS 10kDa concentrate (from a) was digested with trypsin (T5) overnight, heat  
1066 inactivated, then digested with Endo-H or control for 24 hours. GNA lectin and B12  
1067 western blots. Red arrows show likely migration of GNA lectin and B12 reactive bands.  
1068 Black arrows indicate contaminating BSA and position of F40.
- 1069 e) HbSS 10kDa concentrate (from a) subjected to combinatorial protease digestion in mild  
1070 denaturing conditions over 48 hours. Western blot with GNA lectin. (UT) untreated,  
1071 (PC) pepsin 24 hours then chymotrypsin 24 hours, (PT) pepsin 24 hours then trypsin 24  
1072 hours, (C) chymotrypsin 48 hours, (T) trypsin 48 hours, (CT) chymotrypsin 24 hours then  
1073 trypsin 24 hours, with heat inactivation at 24 hours.

1074 f) As d) but with western blotting using antibody B12.

1075 **Purification and properties of F40:** F40 from overnight trypsin digestion of HbSS RBC  
1076 ghosts partitions to the supernatant following heat inactivation (a). We thereby concentrated  
1077 F40, through sequential 100kDa and 10kDa cut off concentrators, by approximately 50-fold  
1078 (a). This preparation exhibited remarkably high GNA lectin binding, approximately 100-fold  
1079 greater than full length spectrin. Sufficient F40 was purified for glycoproteomic analysis.  
1080 PNGase released glycans including three high mannoses, a tri-mannose structure and other  
1081 complex glycans (b). The Endo-H sensitive nature of F40 GNA lectin binding restricts the  
1082 GNA lectin ligands within this pool of structures to the high mannoses:  $\text{Man}_6\text{GlcNAc}_2$ ,  
1083  $\text{Man}_8\text{GlcNAc}_2$  and  $\text{Man}_9\text{GlcNAc}_2$ . GNA lectin reactivity to F40 shows partial sensitivity to  
1084 digestion with chymotrypsin and proteomic analysis of this digest showed the main protein  
1085 represented was  $\alpha$ -spectrin (Fig. 4i). The most abundant peptides came from the N-terminal  
1086 370 amino acids, spanning spectrin repeats 1 to 3, with only scattered, low abundance  
1087 peptides identified from the rest of the molecule and none from  $\beta$ -spectrin. Excluding mass  
1088 spectrometry incompatible regions from this region yielded 34% coverage across spectrin  
1089 repeats 1 to 3, with 64% coverage within repeat 3.

1090 Identification of the N-terminal portion of  $\alpha$ -spectrin as a major constituent of F40 from mass  
1091 spectrometry analysis was also supported by western blotting using B12, an N-terminus  
1092 specific  $\alpha$ -spectrin antibody. The antibody does not bind GNA lectin reactive F40 or two  
1093 higher molecular weight bands directly, but epitopes are revealed by removal of high  
1094 mannoses using Endo-H (c). Furthermore, three new B12-binding bands migrated at a  
1095 slightly lower positions relative to the three GNA lectin binding bands, consistent with  
1096 glycosidase induced cleavages (c). 48 hour-long digestions with combinations of proteases



1097 were able to cleave F40 and, even without Endo-H treatment, unmask B12-binding epitopes  
1098 (e). The GNA lectin and B12-binding fragments align remarkably well under all treatment  
1099 combinations (d, e). These data suggest the high mannose decoration and unusual protein  
1100 structure of F40 limits antibody access and may account for its resistance to proteases.  
1101

### Extended Data Fig. 9

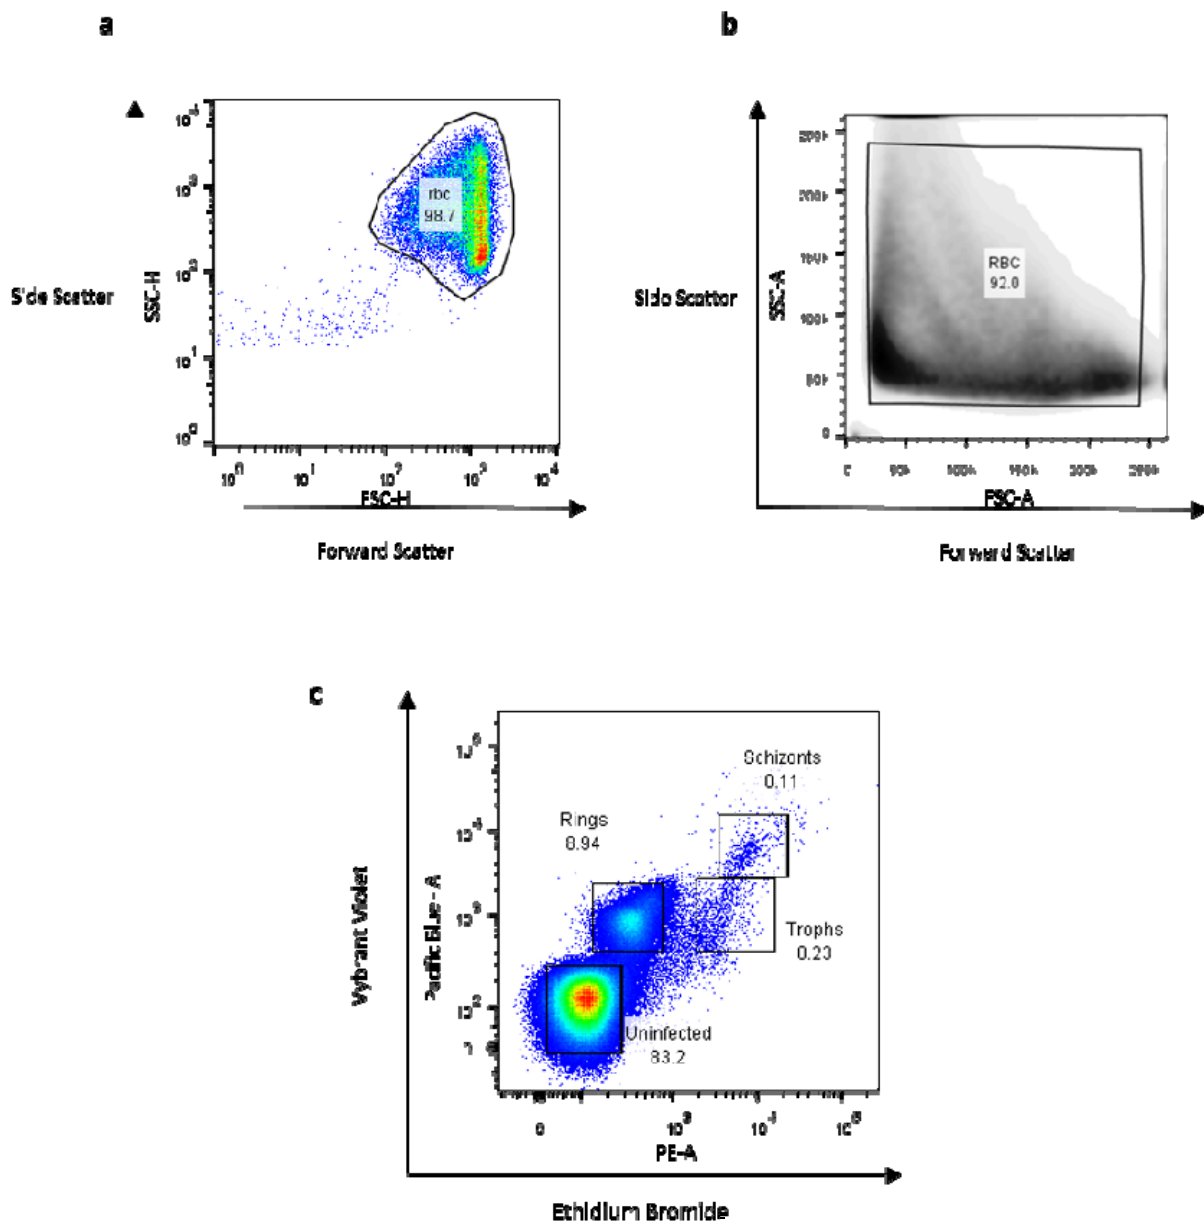

1102

1103 **Extended Data Figure 9. Gating strategy for flow cytometric analysis.**

1104 a) Example of gating strategy for selecting whole red blood cells used in both whole blood  
1105 and purified RBC flow cytometry (with the exception of *P. falciparum* infected RBC  
1106 flow cytometry).

1107 b) Example of first gating of whole red blood cells used in analysis of *P. falciparum*  
1108 infected RBC flow cytometry.

1109 c) Example of second gating of *P. falciparum* infected RBCs by maturation stages as  
1110 defined by ethidium bromide (PE) and Vybrant Violet (Pacific Blue) staining.

1111
